# Precise photometric redshifts with a narrow-band filter set: the PAU survey at the William Herschel Telescope

P. Martí,<sup>1\*</sup> R. Miquel,<sup>1,2</sup> F. J. Castander,<sup>3</sup> E. Gaztañaga,<sup>3</sup> M. Eriksen<sup>3</sup>  
and C. Sánchez<sup>1</sup>

<sup>1</sup>*Institut de Física d'Altes Energies, Universitat Autònoma de Barcelona, E-08193 Bellaterra (Barcelona), Spain*

<sup>2</sup>*Institució Catalana de Recerca i Estudis Avançats, E-08010 Barcelona, Spain*

<sup>3</sup>*Institut de Ciències de l'Espai (ICE, IEEC/CSIC), E-08193 Bellaterra (Barcelona), Spain*

Accepted 2014 April 21. Received 2014 April 12; in original form 2014 February 13

## ABSTRACT

The Physics of the Accelerating Universe (PAU) survey at the William Herschel Telescope will use a new optical camera (PAUCam) with a large set of narrow-band filters to perform a photometric galaxy survey with a quasi-spectroscopic redshift precision of  $\sigma(z)/(1+z) \sim 0.0035$  and map the large-scale structure of the universe in three dimensions up to  $i_{AB} < 22.5$ – $23.0$ . In this paper, we present a detailed photo- $z$  performance study using photometric simulations for 40 equally spaced 12.5-nm-wide (full width at half-maximum) filters with an  $\sim 25$  per cent overlap and spanning the wavelength range from 450 to 850 nm, together with a *ugrizY* broad-band filter system. We then present the migration matrix  $r_{ij}$ , containing the probability that a galaxy in a true redshift bin  $j$  is measured in a photo- $z$  bin  $i$ , and study its effect on the determination of galaxy auto- and cross-correlations. Finally, we also study the impact on the photo- $z$  performance of small variations of the filter set in terms of width, wavelength coverage, etc., and find a broad region where slightly modified filter sets provide similar results, with the original set being close to optimal.

**Key words:** surveys – galaxies: distances and redshifts – galaxies: statistics – large-scale structure of Universe.

## 1 INTRODUCTION

Galaxy surveys are a fundamental tool in order to understand the large-scale structure (LSS) of the universe as well as its geometry, content, history, evolution and destiny. Spectroscopic surveys (2dF, Colless et al. 2001; VVDS, Le Fèvre et al. 2005; WiggleZ, Drinkwater et al. 2010; BOSS, Dawson et al. 2013) provide a 3D image of the galaxy distribution in the near universe, but most of them suffer from limited depth, incompleteness and selection effects. Imaging surveys (SDSS, York et al. 2000; PanSTARRS, Kaiser, Tonry & Luppino 2000; LSST, Tyson et al. 2003) solve these problems but, on the other hand, do not provide a true 3D picture of the universe, due to their limited resolution in the position along the line of sight, which is obtained measuring the galaxy redshift through photometric techniques using a set of broad-band (BB) filters. The Physics of the Accelerating Universe (PAU) survey at the William Herschel Telescope (WHT) in the Roque de los Muchachos Observatory (ORM) in the Canary island of La Palma (Spain) will use narrow-band (NB) filters to try to achieve a quasi-spectroscopic precision in the redshift determination that will allow it to map the

LSS of the universe in 3D using photometric techniques, and, hence, overcoming the limitations of spectroscopic surveys (Benítez et al. 2009).

In this paper, we present the study of the photo- $z$  performance and its impact on clustering measurements expected in the PAU survey in a sample consisting of all galaxies of all types with  $i_{AB} < 22.5$ . Based on detailed simulation studies (Gaztañaga et al. 2012), the requirement for the precision is set at  $\sigma(z)/(1+z) = 0.0035$ . The PAU survey will observe many galaxies beyond the  $i_{AB} = 22.5$  limit that play a crucial role in the PAU science case (Gaztañaga et al. 2012). We will also study the performance in a fainter galaxy sample with  $22.5 < i_{AB} \lesssim 23.7$ , expecting to reach a photo- $z$  precision not worse than  $\sigma(z)/(1+z) = 0.05$  (Gaztañaga et al. 2012). Finally, we will also study the impact on the photo- $z$  performance of small variations on the default filter set, in terms of width, wavelength coverage, etc.

There are two main sets of techniques for measuring photometric redshifts (or photo- $z$ ): template methods (e.g. HYPERZ, Bolzonella, Miralles & Pell 2000; BPZ, Benítez 2000; Coe et al. 2006; LEPHARE, Ilbert et al. 2006; EAZY, Brammer, van Dokkum & Coppi 2008), in which the measured BB galaxy spectral energy distribution (SED) is compared to a set of redshifted templates until a best match is found, thereby determining both the galaxy type and its redshift; training

\*E-mail: pmarti@ifae.es

methods (e.g. ANNZ, Collister & Lahav 2004; ARBORZ, Gerdes et al. 2010; TPZ, Carrasco Kind & Brunner 2013), in which a set of galaxies for which the redshift is already known is used to train a machine-learning algorithm (an artificial neural network, for example), which is then applied over the galaxy set of interest. Each technique has its own advantages and disadvantages, whose discussion lies beyond the scope of this paper.

Throughout the paper, we will be using the Bayesian Photo-Z (BPZ) template-based code from Benitez (2000), after adapting it to our needs. We have also tried several photo- $z$  codes based on training methods. We have found that, because of the large,  $\mathcal{O}(50)$ , number of filters, some of them run into difficulties due to the combinatorial growth of the complexity of the problem, while others confirm the results presented here. The results obtained with training methods will be described in detail elsewhere (Bonnett et al., in preparation).

The outline of the paper is as follows. In Section 2, we present the default PAU filter set. Section 3 discusses the mock galaxy samples that we use in our study, the noise generation, and the split into a bright and a faint galaxy samples. In Section 4, we introduce the BPZ original code and our modifications, with special emphasis on the prior redshift probability distributions and the *odds* parameter. We also show the results obtained when running BPZ on the mock catalogue using the default filter set. Furthermore, we compute the so-called migration matrix  $r_{ij}$  (Gaztañaga et al. 2012), corresponding to the probability that a galaxy at a true redshift bin  $j$  is actually measured at a photo- $z$  bin  $i$ , and its effect on the measurement of galaxy auto- and cross-correlations. In Section 5, we try several modifications to the filter set (wider/narrower filters, bluer/redder filters, etc.), study their performance on the brighter and fainter galaxy samples and find the optimal set. Finally, in Section 6, we discuss the results and offer some conclusions.

## 2 DEFAULT FILTER SET-UP

In this section, we construct the effective filter response  $R(\lambda)$  of the PAU bands and compute their  $5\sigma$  limiting magnitudes,  $m_{AB}(5\sigma)$ .

### 2.1 Nominal response

PAUCam will mount two sets of filters: the BB filters, composed of six bands *ugrizY*,<sup>1</sup> whose nominal (or theoretical) response  $R^{\text{theo}}(\lambda)$  is shown on the top of Fig. 1, and the NB filters, shown on the bottom, which are composed of 40 top-hat adjacent bands with a rectangular width of  $100 \text{ \AA}$  ranging from  $4500$  to  $8500 \text{ \AA}$ . Since there is a technical limitation to construct such narrow top-hat bands, we relax the transition from zero to the maximum response by adding two lateral wings of  $25 \text{ \AA}$  width, resulting in a full width at half-maximum (FWHM) of  $125 \text{ \AA}$ . This induces an overlap of  $\sim 25$  per cent between contiguous bands. Additionally, we set the overall NB response to match that from the ALHAMBRA survey instrument (Moles et al. 2008), which are comparable in technical specifications (although with a wider wavelength range,  $\sim 310 \text{ \AA}$ , transmission) and have similar coatings.

<sup>1</sup>The *u* band is assumed to be the same as the used in the USNO 40-in telescope at Flagstaff Station (Arizona) and its transmission can be obtained from <http://www.sdss.org/dr7/algorithms/standardstars/Filters/response.html>, while the rest are assumed to be the same as in the DECam mounted in the Blanco Telescope (CTIO, Chile).

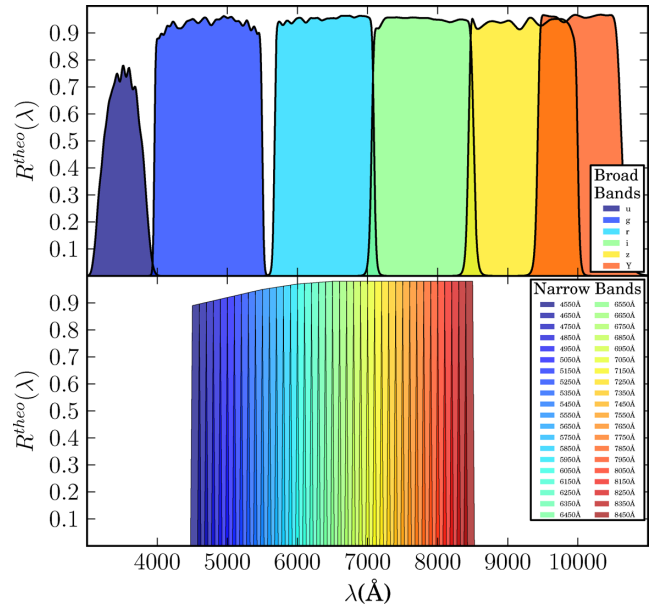

**Figure 1.** The nominal (or theoretical) response  $R^{\text{theo}}(\lambda)$  of the *ugrizY* PAU BBs (top) and the 40 NBs (bottom). The *u* band is the same as in the USNO 40-in telescope at Flagstaff Station (Arizona), while the *grizY* are the same as in the DECam mounted in the Blanco Telescope (CTIO, Chile). The NB filters have a  $125 \text{ \AA}$  FWHM and overlap by 25 per cent with the adjacent bands. They are labelled on the plot through their central wavelength. Their overall response is set to match that of the ALHAMBRA survey bands.

### 2.2 Effective response

The filter responses  $R^{\text{theo}}(\lambda)$  in Fig. 1 are the nominal: this is the response that we would measure if light went only through the filter. Light also goes through the Earth’s atmosphere, which absorbs part of the light, and then, also goes through the optics (mirror and corrector) of the telescope before getting into the filter. Moreover, the CCD detectors behind filters also are affected by a quantum-efficiency (QE) response curve. Therefore, if we want to know the effective response of the filters, we will have to take into account all the transmission curves  $T_i(\lambda)$  of these effects  $i$ . In our case, these curves are shown in the top plot of Fig. 2. The QE curve (blue) corresponds to the measured QE of CCDs provided by Hamamatsu, the measured transmission curve of the telescope’s optics (mirror + corrector) (green) corresponds to that from the WHT optics and the atmospheric transmission curve (red) is taken from the Apache Point Observatory (APO) at New Mexico. We assume that the APO atmosphere transmission is close enough to the ORM for the purpose of this study. The resulting effective response  $R(\lambda)$  is derived with the expression

$$\begin{aligned} R(\lambda) &= R^{\text{theo}}(\lambda) \prod_i T_i(\lambda) \\ &= R^{\text{theo}}(\lambda) T_{\text{CCD}}(\lambda) T_{\text{opt}}(\lambda) T_{\text{atm}}(\lambda). \end{aligned} \quad (1)$$

The transmission of the WHT optics is less than 50 per cent in all the wavelength range, so that the resulting effective responses are significantly reduced. On the other hand, the three transmission curves  $T_i(\lambda)$  begin to fall when they enter the ultraviolet region ( $\sim 3800 \text{ \AA}$ ). Similarly, the CCDs QE drops as we approach the infrared region above  $\sim 9000 \text{ \AA}$ . Overall, the *u* and *Y* BBs are less efficient than the rest. This does not affect the NB, since their wavelength range are within these limits. Atmospheric telluric absorption bands, located

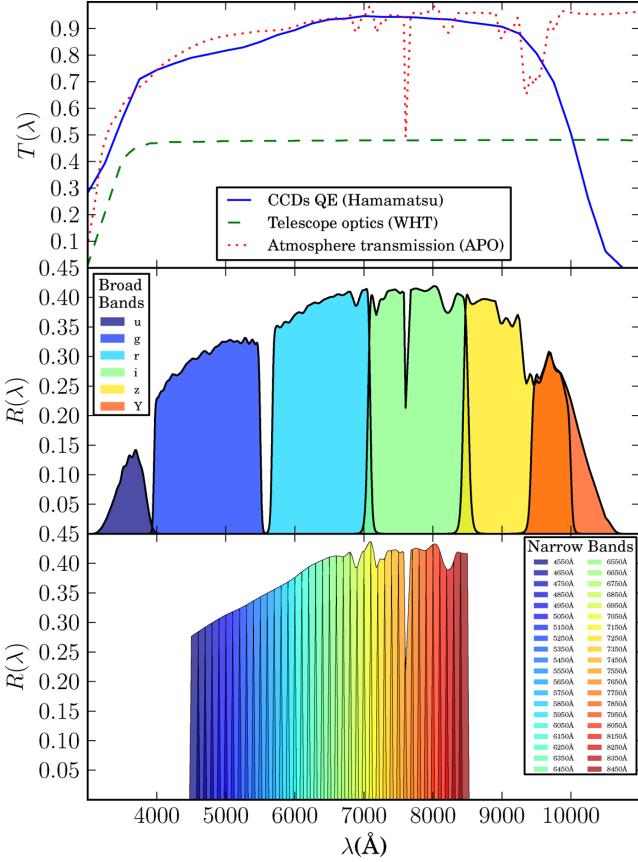

**Figure 2.** Top: the QE curve (blue) of the PAUCam CCDs, the transmission curve of the WHT optics (green) and the atmospheric transmission (red) at the APO, that affect the final response of the PAU bands. The two lower plots are the same as in Fig. 1, but after taking into account these additional transmission curves  $T_i(\lambda)$  through equation (1). For the sake of clarity, we have rescaled the y-axes due to the low efficiency of the mirror’s reflexion.

between  $\sim 700$  nm and  $\sim 1$   $\mu$ m, are also imprinted in the final response of the filters. This is particularly relevant for the NB since their typical width is similar to the width of these valleys. In particular, the profile of the NB with central wavelength at  $\sim 7550$  Å (orange) is drastically changed by the telluric absorption  $A$  band.

### 2.3 $5\sigma$ limiting magnitudes

Next, we compute the  $5\sigma$  limiting magnitudes,  $m_{AB}(5\sigma)$ , for all the PAU bands in the AB photometric system<sup>2</sup> (Oke & Schild 1970). This is the apparent magnitude whose signal-to-noise (S/N) ratio, given by

$$\frac{S}{N} = \sqrt{\frac{A}{\alpha^2}} \frac{N_{\text{gal}}}{\sqrt{N_{\text{gal}} + N_{\text{sky}} + nRN^2}}, \quad (2)$$

<sup>2</sup> According to Hogg et al. (1996), the apparent magnitude  $m_{AB}$  in the AB system in a band with response  $R(\lambda)$  for a source with spectral density flux  $f(\nu)$  (energy per unit time per unit area per unit frequency) is defined as  $m_{AB} \equiv -2.5 \log_{10} \left[ \int f(\nu)R(\nu) \frac{d\nu}{\nu} / \int (3631 \text{ Jy})R(\nu) \frac{d\nu}{\nu} \right]$ , where  $1 \text{ Jy} = 10^{-23} \text{ erg s}^{-1} \text{ cm}^{-2} \text{ Hz}^{-1}$  or  $1.51 \times 10^7 \text{ photons m}^{-2} \text{ s}^{-1} \cdot \frac{\lambda}{\text{Å}}$  in wavelength space.

**Table 1.** Description and values of the WHT and PAUCam parameters used in equations (2)–(4), to compute the S/N.

| Parameter | Description               | Value                          |
|-----------|---------------------------|--------------------------------|
| $\phi$    | Telescope mirror diameter | 4.2 m                          |
| $\alpha$  | FP scale                  | 0.265 arcsec pix <sup>-1</sup> |
| RN        | Read-out noise            | 5 electrons pix <sup>-1</sup>  |
| $A$       | Galaxy aperture           | 2 arcsec <sup>2</sup>          |
| $n$       | # of exposures            | 2                              |

is equal to 5, where

$$N_{\text{gal}} = 3631 \times 1.51 \times 10^7 \times 10^{-0.4m_{AB}} \left( \frac{\alpha^2}{A} \right) \times \pi \left( \frac{\phi}{2} \right)^2 nt_R \int_0^\infty R(\lambda) \frac{d\lambda}{\lambda}, \quad (3)$$

$$N_{\text{sky}} = \alpha^2 \pi \left( \frac{\phi}{2} \right)^2 nt_R \int_0^\infty f_{\text{sky}}(\lambda) R(\lambda) d\lambda, \quad (4)$$

are the photons per pixel coming from the galaxy and the sky brightness, respectively,  $\{\phi, \alpha, RN, A, n\}$  are the parameters of both the WHT and PAUCam instrument, whose values and description are given in Table 1,  $f_{\text{sky}}(\lambda)$  is the spectral density flux per unit of aperture of the sky brightness, whose curve is on top of Fig. 3 and  $t_R$  is the exposure time for the filter  $R(\lambda)$ . All the filters intended for the photometry are arranged over the central part of the focal plane (FP) where vignetting is practically negligible. NB are distributed through five interchangeable trays. From the bluest to the reddest, each tray carries a group of eight consecutive NB. This gives 5 trays  $\times$  8 NB = 40 NB. Values for the exposure times  $T_i$  of each tray are shown on the left-hand column of Table 2. On the other hand, each BB filter is mounted into a dedicated tray with its particular exposure time, in such a way that NB and BB exposure times are completely decoupled. Values for the exposure times  $t_R$  of each BB filter are shown on the right-hand column of Table 2. The exposure

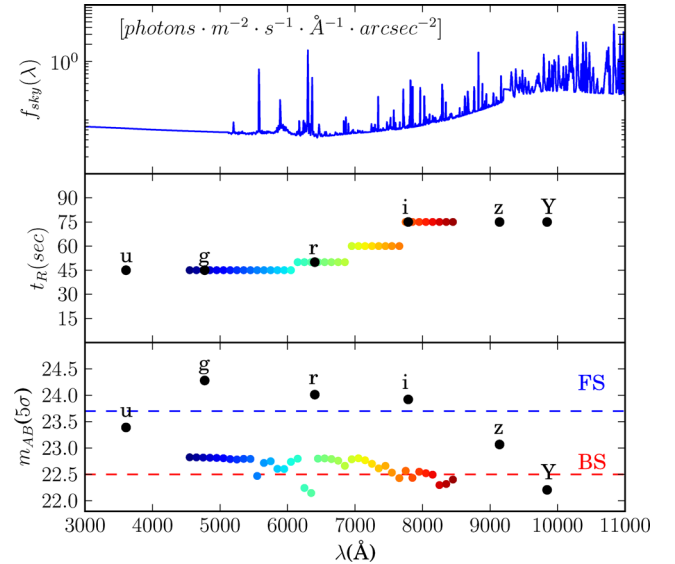

**Figure 3.** Top: a model of the spectral density flux of the sky brightness  $f_{\text{sky}}(\lambda)$  at La Palma (day 7 on the lunar cycle) assuming an airmass of 1.0, used in equation (4). Middle: the exposure times  $t_R$  for each PAU band used in equations (3) and (4). Bottom: the resulting limiting magnitudes  $m_{AB}(5\sigma)$  for each band computed through equations (2)–(4). Coloured points correspond to NBs and black to BBs.

**Table 2.** Left: exposure times  $T_i$  for each PAUCam NB filter tray. The individual NB exposure times are equal to those of the tray where they are. Right: the BB exposure times. Exposure times  $t_R$  per filter are also shown in the middle plot of Fig. 3.

| NB tray $T_i$ |      | BB $t_R$ |      |
|---------------|------|----------|------|
| $T_1$         | 45 s | $u$      | 45 s |
| $T_2$         | 45 s | $g$      | 45 s |
| $T_3$         | 50 s | $r$      | 50 s |
| $T_4$         | 60 s | $i$      | 75 s |
| $T_5$         | 75 s | $z$      | 75 s |
|               |      | $Y$      | 75 s |

times  $t_R$  and the derived limiting magnitudes  $m_{AB}(5\sigma)$  for each filter are also shown on the middle and bottom plots of Fig. 3, respectively, in a colour degradation for NB and in black for BB. Since  $f_{\text{sky}}(\lambda)$  increases with wavelength, exposure times  $t_R$  for redder filters are also set to increase in order to compensate the noise introduced by the sky (note that the exposure times for the NB increase in steps, due to their arrangement in groups per tray). However, this increment is not enough to compensate the sky brightness as we can see with the descending  $m_{AB}(5\sigma)$  with wavelength. Note that the  $u$  band has a lower limiting magnitude compared with  $g$  even being at shorter wavelengths. This is because the  $u$  response is strongly affected by the transmission curves  $T_i$ . Furthermore, there are large drops in  $m_{AB}(5\sigma)$  for the NB with central wavelength 5550 and 6350 Å. This is due to emission lines in the sky spectrum  $f_{\text{sky}}(\lambda)$  at these wavelengths.

### 3 THE MOCK CATALOGUE

In this section, we generate a photometric mock catalogue  $\{m_j \pm \sigma_{m_j}, z, t\}$  with observed magnitudes  $m_j \pm \sigma_{m_j}$  in each PAU band  $j$  for galaxies at redshift  $z$  and with spectral type  $t$ .

#### 3.1 Noiseless magnitudes

We use a method similar to the one described in Jouvel et al. (2009), which consists in sampling the cumulative luminosity function (LF)

$$N(z, t) = \int_{-\infty}^{M_{\text{lim}}(z, t)} \phi x^\alpha e^{-x} dx$$

$$x \equiv 10^{-0.4(M - M^*)}, \quad (5)$$

in the redshift range  $z = [0, 6]$ , for a total of  $N \sim 10^6$  galaxies.  $M$  is the absolute magnitude and  $M_{\text{lim}}(z, t)$  the absolute magnitude limit at redshift  $z$  and spectral type  $t$  for a given apparent magnitude limit of the catalogue  $m_{\text{lim}}$  in some reference band. In our case,  $m_{\text{lim}} < 26.0$  in the  $r_{\text{SDSS}}$  band. Finally,  $\{M^*, \phi, \alpha\}$  are the parameters of the LF, which also depend on  $z$  and  $t$ . We assume that their redshift dependence is

$$\{M^*, \log_{10} \phi, \alpha\} = \{a \exp[-(1+z)^b] + c\}, \quad (6)$$

where  $\{a, b, c\}$  are type-dependent parameters whose values are in Table 3. These values are chosen to match the LFs and their evolution from Dahlen et al. (2005), where three different spectral types, 1 = Elliptical (Ell), 2 = Spiral (Sp), 3 = Irregular (Irr), are distinguished.

**Table 3.** Parameters  $\{a, b, c\}$  that, through equation (6), give the values and evolution in redshift of the LF parameters  $\{\log_{10} \phi, M^*, \alpha\}$  for a given spectral type  $t$ . These values are based on the LFs in Dahlen et al. (2005), where three galaxy types are distinguished: 1 = Ell, 2 = Sp and 3 = Irr.

| $t$ | $\log_{10} \phi$ |      |       | $M^*$ |     |        | $\alpha$ |      |       |
|-----|------------------|------|-------|-------|-----|--------|----------|------|-------|
|     | $a$              | $b$  | $c$   | $a$   | $b$ | $c$    | $a$      | $b$  | $c$   |
| 1   | 2.4              | 1.1  | -2.7  | 5.0   | 1.6 | -21.90 | 1.7      | 1.6  | -1.00 |
| 2   | 0.5              | 0.1  | -2.28 | 3.2   | 2.5 | -21.00 | 0.7      | -0.9 | -1.50 |
| 3   | 1.0              | -3.5 | -3.1  | 5.0   | 1.3 | -20.00 | 1.8      | 0.9  | -1.85 |

The relation between the absolute magnitude  $M$  and the apparent magnitude  $m$  for a galaxy at redshift  $z$  and with spectral type  $t$ , used in the magnitude limit of equation (5), is

$$M = m - 5 \log_{10} D_L(z) - 25 - K(z, t), \quad (7)$$

where  $D_L(z)$  is the luminosity distance of the galaxy at redshift  $z$  in Mpc, which in a  $\Lambda$  cold dark matter universe is expressed as

$$D_L(z) \equiv (1+z) \frac{c}{H_0} \int_0^z \frac{dz}{\sqrt{\Omega_M(1+z)^3 + \Omega_\Lambda}}, \quad (8)$$

with cosmological parameters chosen to be:  $H_0 = 75$  (km s<sup>-1</sup>) Mpc<sup>-1</sup>,  $\Omega_M = 0.25$  and  $\Omega_\Lambda = 0.75$ , and  $K(z, t)$  is the  $K$ -correction

$$K(z, t) \equiv -2.5 \log_{10} \left[ \frac{1}{1+z} \frac{\int_0^\infty f_t(\lambda) R_0(\lambda) \lambda d\lambda}{\int_0^\infty f_t((1+z)\lambda) R_0(\lambda) d\lambda} \right], \quad (9)$$

where  $R_0(\lambda)$  is the response of the reference band,  $f_t(\lambda)$  is the SED of the galaxy with spectral type  $t$  in the rest frame and  $f_t((1+z)\lambda)$  the same SED at redshift  $z$ . As a representation of these SEDs, we use the CWW (Coleman, Wu & Weedman 1980) extended template library from the LEPHARE<sup>3</sup> photo- $z$  code. It contains 66 templates ranging through Ell → Sp → Irr and shown in Fig. 4. We split them in three groups: Ell = (0–17), Sp = (17–55) and Irr = (55–66). Then, a specific template within one of these groups is randomly selected and assigned to the galaxy. Actually, we allow the spectral type  $t$  to range from 1 to 66 with a resolution of 0.01 by interpolating between templates.

After assigning  $\{z, t\}$  values for all galaxies, we also assign them an absolute magnitude  $M$  randomly within the range  $[-\infty, M_{\text{lim}}(z, t)]$  following the LF probability distribution in equation (5). Then, the apparent magnitude  $m_0$ , in our reference band  $r_{\text{SDSS}}$ , is computed from equation (7). The other magnitudes  $m_j$  at any band  $j$  are obtained through

$$m_j = m_0 + 2.5 \log_{10} \left[ \frac{\int_0^\infty f_t((1+z)\lambda) R_0(\lambda) \lambda d\lambda}{\int_0^\infty f_t((1+z)\lambda) R_j(\lambda) \lambda d\lambda} \frac{\int_0^\infty R_j(\lambda) \frac{d\lambda}{\lambda}}{\int_0^\infty R_0(\lambda) \frac{d\lambda}{\lambda}} \right], \quad (10)$$

where  $R_j(\lambda)$  is the response of some PAU band  $j$ .

<sup>3</sup>The extended CWW library can be found in the folder /lephare\_dev/sed/GAL/CE\_NEW/ of the LEPHARE package at [http://www.cfht.hawaii.edu/~arnouts/LEPHARE/DOWNLOAD/lephare\\_dev\\_v2.2.tar.gz](http://www.cfht.hawaii.edu/~arnouts/LEPHARE/DOWNLOAD/lephare_dev_v2.2.tar.gz).

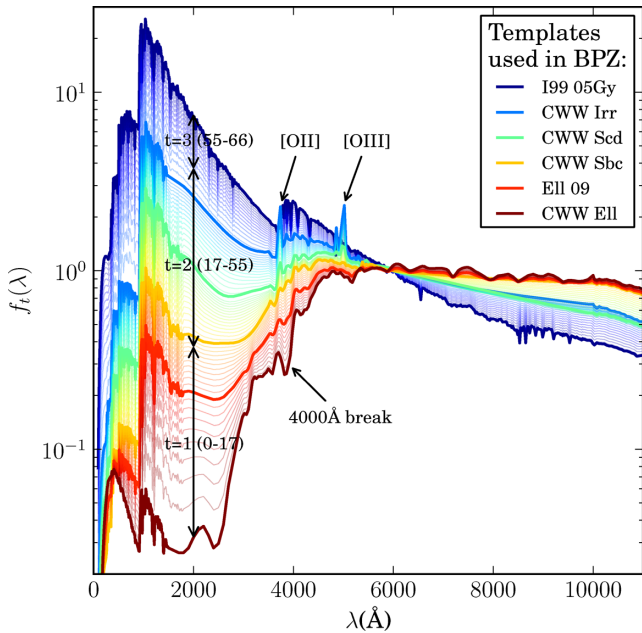

**Figure 4.** The 66 spectral templates in the rest frame extracted from the extended CWW library. They are used, in equations (7) and (10), to generate the photometry of the PAU mock catalogue. They evolve from Ellipticals (0–17, in red) to Spirals (17–55, in yellow, green and cyan), and finally to Irregulars (55–66, in blue and violet). Wider and deeper curves highlight the five templates used in BPZ to compute the photo- $z$ .

### 3.2 Noisy magnitudes

The resulting magnitudes are noiseless, so we have to transform them to observed magnitudes by adding a random component of noise as follows:

$$m_j \rightarrow m_j + \eta(0, 1)\sigma_{m_j}, \quad (11)$$

where  $\eta(0, 1)$  is a normal variable and  $\sigma_{m_j}$  the expected magnitude error which is related to the S/N in equation (2) as follows:

$$\sigma_{m_j} = 2.5 \log_{10} \left( 1 + \frac{1}{(S/N)_j} \right). \quad (12)$$

Additionally, we add an extra component of noise of size  $\sim 0.022$ , corresponding to an  $S/N = 50$ , in quadrature to  $\sigma_m$ , which takes into account some possible photometric calibration issues. Finally, we obtain the mock catalogue  $\{m_j \pm \sigma_{m_j}, z, t\}$ .

The resulting  $\sigma_m$  versus  $m$  scatter plots, in the  $i$  BB and the 7750 Å NB, are shown in Fig. 5, where for the sake of clarity we only plot 10 000 randomly selected galaxies. The 7750 Å band is chosen because its central wavelength is very similar to that of the  $i$  band. Note, how on both bands  $\sigma_m$  starts being flat at  $\sim 0.022$  (the calibration error), and then, at fainter magnitudes, when the sky brightness and the CCD read-out noise become important, it grows and the scatter becomes wider.

### 3.3 Bright and faint samples

The PAU survey science will be mostly focused on LSS studies such as cross measurements of redshift space distortions (RSD) and magnification bias (MAG) between two galaxy samples: the bright sample (BS) on the foreground and the faint sample (FS) on the background (see Gaztañaga et al. 2012). The BS should contain galaxies bright enough to have a large S/N in all bands, including the NBs, and, therefore, reach the necessary photo- $z$  accuracy to

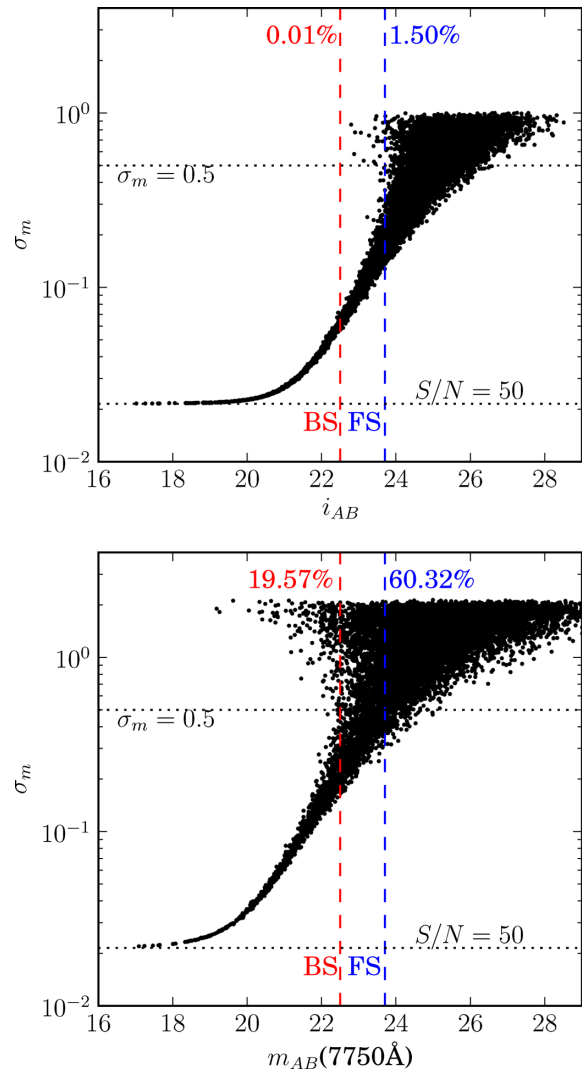

**Figure 5.** Scatter plots of  $\sigma_m$  versus  $m$  for the  $i$  BB (top) and the 7750 Å NB (bottom). For the sake of clarity, only 10 000 randomly selected galaxies are plotted. The magnitude limits of the BS (red) and FS (blue) are also plotted as vertical-dashed lines. The bottom dotted line in both plots shows the calibration error ( $S/N = 50$ ) added in quadrature to  $\sigma_m$ , while the top dotted line shows the threshold where magnitudes are considered as non-observed. The proportions of non-observed magnitudes ( $\sigma_m > 0.5$ ) in each sample are also shown at the top with their correspondent colour.

measure RSD. We see in Fig. 3 that the  $5\sigma$  limiting magnitudes for the NB are close to 22.5, so we define the BS as all those galaxies with  $i_{AB} \equiv m_{AB}(i) < 22.5$ . The FS will contain the rest of the galaxies within  $22.5 < i_{AB} < 23.7$ . The upper limit has been chosen to roughly match the  $5\sigma$  limiting magnitudes of the BBs (see Fig. 3). We consider that a magnitude is not observed in one band if its correspondent error is  $\sigma_m > 0.5$ . We find that a  $\sim 0.01$  per cent of galaxies in the BS are not observed in the  $i$  band, with the fraction increasing to  $\sim 1.5$  per cent in the FS. Similarly, in the BS  $\sim 19.57$  per cent are not observed in the 7750 Å band, increasing to  $\sim 60.32$  per cent in the FS (see Fig. 5). This tells us that, while most of the BB information will be present in both samples, the presence of NB information in the FS will be rather limited, degrading considerably the photo- $z$ .

In Fig. 6, we show the resulting distributions of the magnitude  $i_{AB}$  (top left), the true redshift  $z$  (top right) and the spectral type  $t$

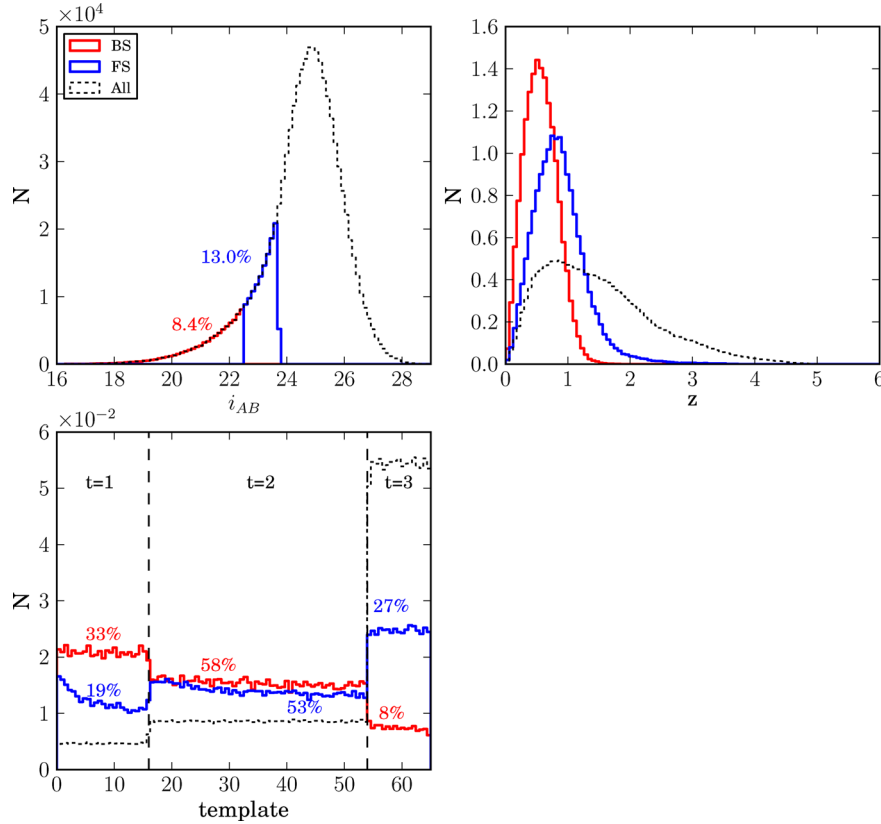

**Figure 6.** The observed magnitude in the  $i$  band (top-left), true redshift (top-right) and spectral type distributions for the whole catalogue (black), the BS  $i_{AB} < 22.5$  (red) and the FS  $22.5 < i_{AB} < 23.7$  (blue). We also show the fraction of the total galaxies in each sample in the magnitude distribution plot, in their corresponding colour. Similarly, we show the proportions of spectral types in each sample. The redshift and type distributions have been normalized.

(bottom) of the galaxies in the whole catalogue (black-dotted), the BS (red-solid) and the FS (blue-solid). The magnitude distribution of the whole catalogue has its maximum at  $\sim 25.0$ , so that the BS and FS are on the brighter tail of the distribution and account for  $\sim 8.4$  and  $\sim 13$  per cent of the whole catalogue, respectively. However, this also helps both samples to have a very good completeness up to their magnitude limit. We can also see that, while the whole catalogue extends up to  $z \sim 5$ , the BS only goes up to  $z \sim 1.5$  and the FS up to  $z \sim 3$ . Finally, we see that both BS and FS have a similar proportion of Spiral galaxies ( $t = 2$ ),  $\sim 55$  per cent; however, the BS contains more elliptical galaxies (33 per cent) than the FS (19 per cent), and consequently, the FS contains more irregular galaxies.

#### 4 PHOTO- $z$ PERFORMANCE

In this section, we compute the photometric redshifts  $z_{\text{ph}}$  of the galaxies in the BS and the FS generated in the previous section and analyse their photo- $z$  performance through different statistical metrics: bias, photo- $z$  precision and outlier fraction. We also apply some photo- $z$  quality cuts (*odds cuts*) on the results and analyse how the performance improves. We investigate how many galaxies with poor photo- $z$  quality we need to remove in order to achieve the photo- $z$  precision requirements defined in Gaztañaga et al. (2012).

The photo- $z$   $z_{\text{ph}}$  are obtained using the BPZ<sup>4</sup> template-fitting code described in Benitez (2000). It uses Bayesian statistics to produce

a posterior probability density function  $p(z|m_j)$  that a galaxy is at redshift  $z$  when its magnitudes in the different bands  $j$  are  $m_j$

$$p(z|m_j) \propto \sum_t L(m_j|z, t) \Pi(z, t|m), \quad (13)$$

where  $L(m_j|z, t)$  is the likelihood that the galaxy has magnitudes  $m_j$ , if its redshift is  $z$  and its spectral type  $t$ , and  $\Pi(z, t|m)$  is the prior probability that the galaxy has redshift  $z$  and spectral type  $t$  when its magnitude in some reference band is  $m$ . The proportionality symbol is a reminder that  $p(z|m_j)$  must be properly normalized in order to be a probability density function. The photometric redshift  $z_{\text{ph}}$  of the galaxy will be taken as the position of the maximum of  $p(z|m_j)$ .

We have modified the BPZ code in order to increase its efficiency when estimating photo- $z$  using a large number of NB filters. Instead of estimating the photo- $z$  for each galaxy, the calculations are done in blocks of hundreds of galaxies using linear operations. Details will be presented in Eriksen et al. (in preparation).

#### 4.1 Templates

The likelihood  $L(m_j|z, t)$  is generated by comparing the observed magnitudes with the ones that are predicted through a collection of galaxy templates that span all the possible galaxy types  $t$ . BPZ includes its own template library; however, we use a subset of six templates from the same library used in the previous section for the mock catalogue generation. They are highlighted in Fig. 4 and correspond to the templates with file name: CWW\_E11 sed, E11\_09 sed, CWW\_Sbc sed, CWW\_Scd sed, CWW\_Irr sed and I99\_05Gy sed. Additionally, we also include two interpolated templates between

<sup>4</sup> BPZ can be found at <http://acs.pha.jhu.edu/~txitxo/bayesian.html>.

**Table 4.** The resulting values of the prior parameters obtained by fitting (14) to a subset of 10 000 randomly selected galaxies from the BS and FS together. The three galaxy types  $t = 1, 2, 3$  are the same that were defined in Section 3 for the LFs.  $f_3$  and  $k_3$  do not appear because  $\Pi(t = 3|m_0)$  is deduced by normalization.

| $t$ | $f$   | $k$   | $\alpha$ | $z_0$ | $k_m$ |
|-----|-------|-------|----------|-------|-------|
| 1   | 0.565 | 0.186 | 2.456    | 0.312 | 0.122 |
| 2   | 0.430 | 0.000 | 1.877    | 0.184 | 0.130 |
| 3   | –     | –     | 1.404    | 0.047 | 0.148 |

each consecutive pair of the six by setting the BPZ input parameter INTERP=2. This results in a total of 16 templates. However, we will see later in Fig. 10 that the number of interpolated templates does not affect much the photo- $z$  performance.

## 4.2 Prior

An important point of BPZ is the prior probability  $\Pi(z, t|m)$  that helps improve the photo- $z$  performance. Benitez (2000) proposes the following empirical function:

$$\Pi(z, t|m) = \Pi(t|m)\Pi(z|t, m) \propto f_t e^{-k_t(m-m_0)} z^{\alpha_t} \exp\left\{-\left[\frac{z}{z_{m_t}(m)}\right]^{\alpha_t}\right\}, \quad (14)$$

where  $z_{m_t}(m) = z_{0t} + k_{m_t}(m - m_0)$  and  $m_0$  is a reference magnitude, in our case equal to 19 in the  $i$  band. Each spectral type  $t$  has associated a set of five parameters  $\{f, k, \alpha, z_0, k_m\}$  that determine the shape of the prior. In order to calibrate the prior  $\Pi(z, t|m)$  and determine the value of these parameters, we construct a training sample consisting of 10 000 galaxies randomly selected from the mock catalogue with  $i_{AB} < 24$ . We only need to know their observed magnitude  $i_{AB}$  in our reference band, their true redshift  $z_{tr}$  and their true spectral type  $t_{tr}$ . Originally,  $t$  ranged from 0 to 66 which is the number of templates used to generate the mock catalogue; however, as we did for the LFs galaxy types in the previous section, we group all these galaxy types in three groups:  $t = 1$  (ellipticals),  $t = 2$  (spirals) and  $t = 3$  (irregulars), whose correspondence is  $1 \rightarrow (0-17)$ ,  $2 \rightarrow (17-55)$  and  $3 \rightarrow (55-66)$ . From now on, we will use  $t$  for either the 66 templates or these three galaxy-type groups. Finally, we fit equation (14) to the training sample and recover the prior parameters. We show the resulting values in Table 4. Parameters  $f_3$  and  $k_3$  do not appear in the table because  $\Pi(t = 3|m_0)$  is deduced by imposing the proper normalization. In Fig. 7, we show a comparison between the fitted curve and the actual distribution of the prior.  $\Pi(t|m)$  on the left and  $\Pi(z|t, m)$  on the right are shown at different magnitudes (rows) from  $i_{AB} = 19$ , the reference magnitude, to  $i_{AB} = 24$ . On the one hand, the fitted  $\Pi(t|m)$  agrees by definition with the actual distribution at the reference magnitude (top row), since we use those values as a starting point. However, at higher magnitudes a significant mismatch appears for the spiral and irregular galaxies. This is related to the fact that the  $k$  parameters, which control the migration of galaxies from one spectral type to another across magnitude, are positive definite. With this, elliptical and spiral galaxies should turn to irregulars as the magnitude increases. However, in Fig. 7 we observe that actually the spiral abundance grows slightly before starting to decrease at  $m \sim 21$ , and this forces the fit to  $k_2 = 0$ . Consequently, elliptical galaxies migrate directly to irregulars, causing a mismatch on the pace of growth of this galaxy-type abundance. On the other hand, the fit of  $\Pi(z|t, m)$

is particularly good for Ell and Sp galaxies at higher magnitudes (the eight bottom-left panels on the right plot of Fig. 7), but for Irr and magnitudes close to the 19 (the reference magnitude) it is less accurate.

In Fig. 8, we show a comparison between the  $z_{tr}$  (solid) and  $z_{ph}$  (discontinuous) distributions for the BS and the FS. For the sake of clarity, the  $x$ - and  $y$ -axes have been set to be linear below  $z = 2$  and  $N = 0.1$ , respectively, and logarithmic elsewhere. Dashed lines correspond to  $z_{ph}$  obtained by maximizing only the likelihood  $L(m_j|z, t)$  in (13). This gives a  $z_{ph}$  distribution in the BS very close to the actual, while in the FS a residual long tail towards much higher redshift ( $z \sim 5$ ) appears. In Fig. 9, we show the equivalent  $\Delta z/(1 + z_{tr})$  distributions, where  $\Delta z \equiv z_{ph} - z_{tr}$ . Once again, the  $x$ - and  $y$ -axes have been set to be linear below  $|\Delta z|/(1 + z_{tr}) = 1$  and  $N = 0.05$ , respectively, and logarithmic elsewhere. Note that the tail is also present on the right-hand side of the blue curve. If we define as *catastrophic outliers* those galaxies with  $|\Delta z|/(1 + z_{tr}) > 1$ , we find that they account for  $\sim 7.7$  per cent in the FS (the blue region under the curve) and  $\sim 0.2$  per cent in the BS. Catastrophic outliers are typically caused by degeneracies in colour space, which cause confusions in the template fit and result in a much larger  $|\Delta z|$ . The blue-dotted line in Fig. 9 shows that when the prior is included almost all of the catastrophic outliers in the FS are removed, leaving only a small fraction of  $\sim 0.1$  percent. We see in Fig. 8 that the  $z_{ph}$  distribution after applying the prior (blue dot-dashed) decays at high redshifts faster than the  $z_{tr}$  distribution. This is because we are only using the maximum of  $p(z|m_j)$  for the  $z_{ph}$  value. If we use the whole probability density function (pdf) information (blue-dotted line), the resulting  $z_{ph}$  distribution is much closer to the true. Defining the photo- $z$  precision  $\sigma_z$  as half of the symmetric interval that encloses the 68 per cent of the  $\Delta z/(1 + z_{tr})$  distribution area around the maximum, we find that  $\sigma_z$  almost does not change in the BS (0.72–0.70 per cent), while it improves by a factor of  $\sim 1.8$  in the FS by going from  $\sigma_z \sim 16$  to  $\sim 8.86$  percent when adding the prior. In the BS sample, the likelihood function is already narrow enough, thanks to the constraining power of the NBs, and, hence, the prior has very limited impact on the final result.

## 4.3 Performance versus template interpolation

At this point, we want to explore how the number of interpolated templates used in BPZ changes the  $z_{ph}$  performance. In Fig. 10, we show the  $\Delta z/(1 + z_{tr})$  distribution only for the BS when we use: 9 (blue), 2 (red) and 0 (green), interpolated templates. Solid lines correspond to the  $z_{ph}$  obtained when the input magnitudes are noiseless (without applying equation 11), while dotted lines include the noise. The  $\sigma_z$  of each distribution is shown in the legend. We see that, while for noiseless magnitudes the number of interpolated templates has a significant impact on the width of the distributions and so, on their  $\sigma_z$ , which gets worse by a factor of  $\sim 3$  at each step, for noisy magnitudes these differences are smaller. In fact, going from 9 to 2 interpolated templates the differences are negligibly small and going from 2 to 0 interpolations the difference is less than a factor of 2.

## 4.4 Performance versus odds

Photo- $z$  codes, besides returning a best estimate for the redshift, typically also return an indicator of the photo- $z$  quality. It can be simply an estimation of the error on  $z_{ph}$ , or something more complex,

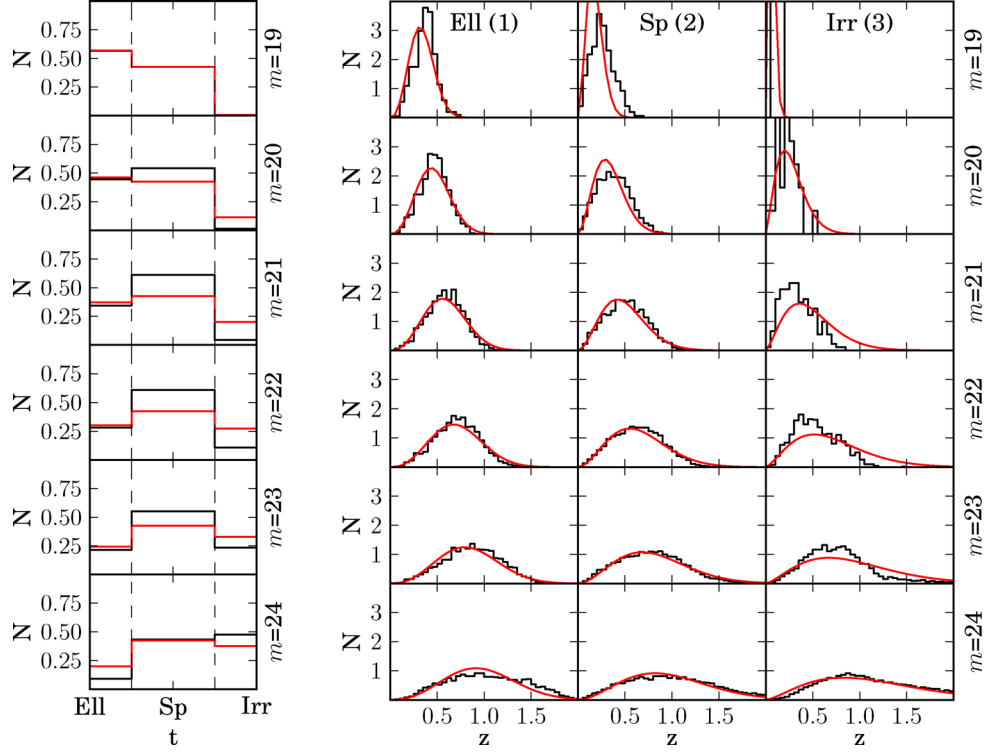

**Figure 7.** Left: comparison between the fitted  $\Pi(t|m)$  prior (red) of equation (14) and the actual distribution (black). Right: the same for  $\Pi(z|t, m)$ . We only differentiate between three galaxy types  $t$  (as we did for the LFs in Section 3): 1 = Elliptical, 2 = Spiral and 3 = Irregular. Rows correspond to  $i_{AB}$  magnitude bins of width  $\Delta m = 0.2$  centred at values from  $m = 19$  to 24 in steps of 1. All curves have been normalized. Resulting prior parameters are on Table 4.

but the aim is the same. In BPZ, this indicator is called *odds*, and, it is defined as

$$odds = \int_{z_{ph}-\delta z}^{z_{ph}+\delta z} p(z|m_j) dz, \quad (15)$$

where  $\delta z$  determines the redshift interval where the integral is computed. *Odds* can range from 0 to 1, and the closer to 1, the more reliable is the photo- $z$  determination, since  $p(z|m_j)$  becomes sharper and most of its area is enclosed within  $z_{ph} \pm \delta z$ . We choose  $\delta z = 0.0035$  in the BS and 0.05 in the FS, which is close to the expected  $\sigma_z$  in these samples for the PAU Survey (see the  $\sigma_z$  plots in Fig. 11). A bad choice of  $\delta z$  could lead to the accumulation of all *odds* close to either 0 or 1. Since *odds* are a proxy for the photo- $z$  quality, we should expect a correlation between the *odds* and  $|\Delta z|$  in the sense that higher *odds* should correspond to lower  $|\Delta z|$ .

At the top of Fig. 11, we show the  $\Delta z/(1+z_{tr})$  distributions in a colour degradation for subsets of the BS (left) and the FS (right) with increasingly higher cuts on the *odds* parameter. In fact, the exact *odds* values are quite arbitrary, since they depend on the size of  $\delta z$ . Therefore, we have translated these *odds* cuts into the fraction of the galaxy sample remaining after a certain cut has been applied, in such a way that the bluest curve corresponds to 100 per cent completeness while the reddest corresponds to 5 per cent completeness, with 5 per cent steps. We can clearly see how the harder are the *odds* cuts, the narrower and peaky become the distributions in both samples. On the bottom plots of the same figure, we show how some statistical metrics of these distributions (the bias (median), the photo- $z$  precision ( $\sigma_z$ ) and the  $3\sigma$ -outlier fraction) depend on each *odds* cut of completeness given in the x-axis. The  $3\sigma$ -outlier fraction is defined as the fraction of galaxies with  $|\Delta z|/(1+z_{tr}) > 3\sigma_z$ . For the sake of clarity, each point has

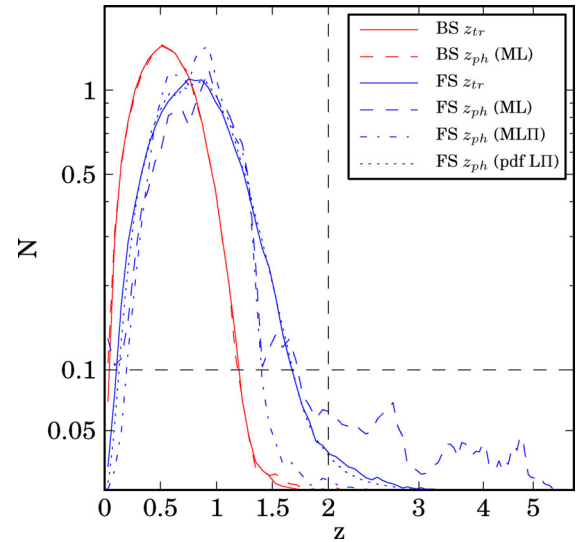

**Figure 8.** Comparison between the true redshift (solid) and the photo- $z$  (discontinuous) distributions for the BS (red) and FS (blue). For the sake of clarity, we have set the x- and y-axis scales to be linear below the black dashed lines and logarithmic above them. All distributions have been normalized to equal area. Dashed lines correspond to the  $z_{ph}$  obtained by maximizing only the likelihood  $L(m_j|z, t)$  (ML) of (13), the dash-dotted line includes the prior (MLII) and the dotted line corresponds to the case when all the  $p(z|m_j)$  are stacked (pdf LII).

been coloured as its correspondent distribution. Errors are computed by bootstrap (Efron 1979) for the bias and  $\sigma_z$ , and, by computing the  $\sigma_{68}$  of a binomial distribution with mean  $n_{outlier}/N$  for the outlier fraction. As we expected,  $\sigma_z$  decreases as the *odds* cuts get more



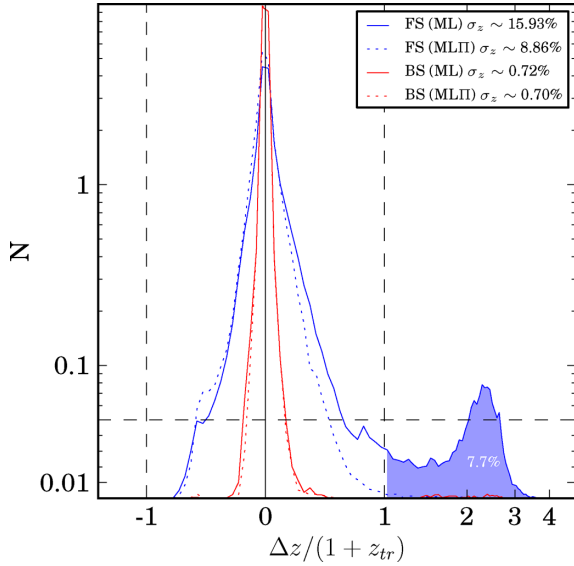

**Figure 9.**  $\Delta z/(1+z_{tr})$  distributions, where  $\Delta z \equiv z_{ph} - z_{tr}$ , for the BS (red) and FS (blue) with the  $z_{ph}$  obtained by maximizing only the likelihood  $L(m_j|z, t)$  (ML) (solid) or when also including the prior (MLΠ) (dotted). Photo- $z$  precision  $\sigma_z$  values, defined as half of the symmetric interval that encloses the 68 per cent of the distribution area around the maximum, are shown for each case in the legend. The  $x$ -axis scale is linear between the two dashed vertical lines and logarithmic on the sides. Similarly, the  $y$ -axis is linear below the horizontal dashed line and logarithmic above. The prior makes no difference on the BS, but in the FS it removes the long tail (blue region) of catastrophic outliers ( $|\Delta z|/(1+z_{tr}) > 1$ ) that accounts for a  $\sim 7.7$  per cent of the sample. This reduces  $\sigma_z$  by a factor of  $\sim 1.8$ .

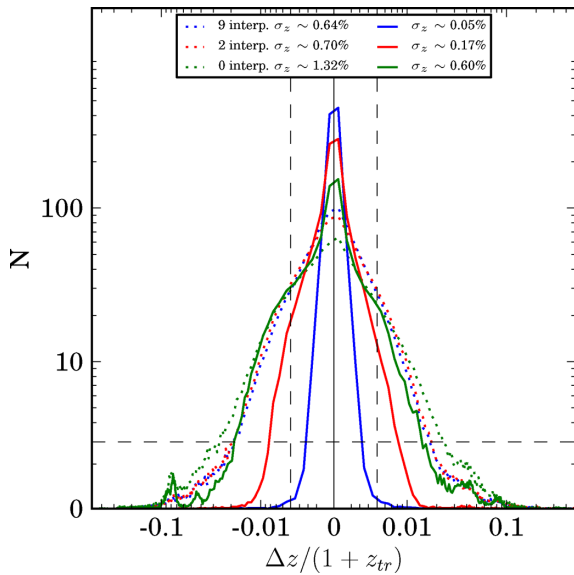

**Figure 10.** The  $\Delta z/(1+z_{tr})$  distributions for the BS using different number of interpolated templates in BPZ, when input magnitudes are noiseless (solid) and when they are noisy (dotted). Photo- $z$  precision  $\sigma_z$  values for each case are shown on the legend. The  $x$ -axis scale is linear between the two dashed vertical lines and logarithmic on the sides. Similarly, the  $y$ -axis is linear below the horizontal dashed line and logarithmic above.

stringent. In the BS (left), it goes from  $\sim 0.7$  per cent at 100 per cent of completeness to  $\sim 0.1$  per cent at 5 per cent, and in the FS (right), from  $\sim 9$  to  $\sim 1$  per cent. The photo- $z$  precision requirements, as defined in Gaztañaga et al. (2012), are  $\sigma_z < 0.35$  per cent in the BS and  $\sigma_z < 5$  per cent in the FS. They are fulfilled when  $\sim 50$  per cent of each catalogue is removed. We find a very small bias of a few per cent of  $\sigma_z$  in both samples towards negative  $\Delta z$  values. It practically vanishes when high *odds* cuts are applied. The  $3\sigma$ -outlier fraction in the BS starts at  $\sim 13$  per cent, drops to  $\sim 3$  per cent at  $\sim 40$  per cent completeness and then, starts increasing again up to  $\sim 4.5$  per cent at  $\sim 10$  per cent completeness. Therefore, we deduce that the gain on  $\sigma_z$  with the *odds* cut occurs basically through the cleaning of outliers. However, in the FS, even if  $\sigma_z$  decreases with the *odds* cuts, the outlier fraction increases from  $\sim 7$  to  $\sim 9$  per cent at  $\sim 15$  per cent completeness.

On the last three rows of plots in Figs 12 (BS) and 13 (FS), we show how these statistical metrics depend on the observed magnitude  $i_{AB}$  (left), the true spectral type  $t_{tr}$  (centre) and the true redshift  $z_{tr}$  (right), after each photo- $z$  quality cut shown in Fig. 11 in the same colour. In the first three rows and by order, we also show the scatter plot  $\Delta z/(1+z_{tr})$ , the number of galaxies and the completeness after the same photo- $z$  quality cuts with respect to the same variables ( $i_{AB}, t_{tr}, z_{tr}$ ) on the  $x$  axis.

In the BS (Fig. 12), we can see that the low photo- $z$  quality galaxies (blue points in the scatter plot) are mostly faint galaxies with  $i_{AB} > 21$ , the magnitude where the noise coming from the sky brightness plus the CCD read-out starts to be comparable to the Poisson noise in signal. This is reflected in Fig. 5 as a turning point on the slope of the  $\sigma_m$  versus  $m_{AB}$  scatter. In fact, these galaxies represent most of the outliers and the principal source of bias seen in Fig. 11. As the *odds* cuts are applied, these bad photo- $z$  faint galaxies are removed. The *odds* cut removes the bias, reduces  $\sigma_z$  from  $\sim 2.2$  to  $\sim 0.35$  per cent and the outlier fraction from  $> 10$  to  $\sim 1$  per cent at magnitudes close to the limit  $i_{AB} = 22.5$ . Looking at the scatter plots of the next two columns in Fig. 12, we realize that these low-*odds* galaxies at faint magnitude are spread out over the whole  $t_{tr}$  and  $z_{tr}$  ranges. Moreover, after the hardest *odds* cut, only galaxies of types  $t \sim 0$  (elliptical) and  $t \sim 50$  (irregular) survive and the mean of  $z_{tr}$  is shifted from  $\sim 0.6$  to  $\sim 0.4$ . The worst bias,  $\sigma_z$  and outlier fraction are obtained for spiral galaxies ( $t \sim 10$ – $30$ ). The *odds* cuts mitigate these results, but even after applying them, spiral galaxies still have the worst bias and  $\sigma_z$ . The worst bias is located at low and high  $z_{tr}$ , with opposite sign and it is largely reduced with the *odds* cuts. The value of  $\sigma_z$  gets flatter over all  $z_{tr}$  as the *odds* cuts are harder.

Regarding the  $z_{ph}$  precision requirement  $\sigma_z < 0.35$  per cent (black solid horizontal line), we find that, when no *odds* cut is applied, it is achieved only for galaxies with  $i_{AB} < 21$  and galaxy type around  $t \sim 50$  (irregulars). However, it is not fulfilled at any  $z_{tr}$ . Once we apply a 50 per cent completeness *odds* cut, which gives an overall  $\sigma_z$  equal to the requirement, as we saw in Fig. 11, the requirement is fulfilled in all the  $i_{AB}$  and  $z_{tr}$  ranges. Only for spiral galaxies, the requirement is not fulfilled even after the hardest *odds* cut. Originally, in Benítez et al. (2009), it was assumed that elliptical galaxies (or rather luminous red galaxies) yield the best photo- $z$  precision in the PAU Survey, with the NBs tracking the  $\sim 4000$  Å break spectral feature (Fig. 4). This is partially true, since we actually see that elliptical galaxies give better  $\sigma_z$  than spirals, but our analysis shows that in fact irregulars with  $t \sim 50$  give the best photo- $z$  performance. Before any *odds* cut, their photo- $z$  precision is almost twice better than the requirement. Probably, this is due to the fact that, in contrast to elliptical galaxies were a single

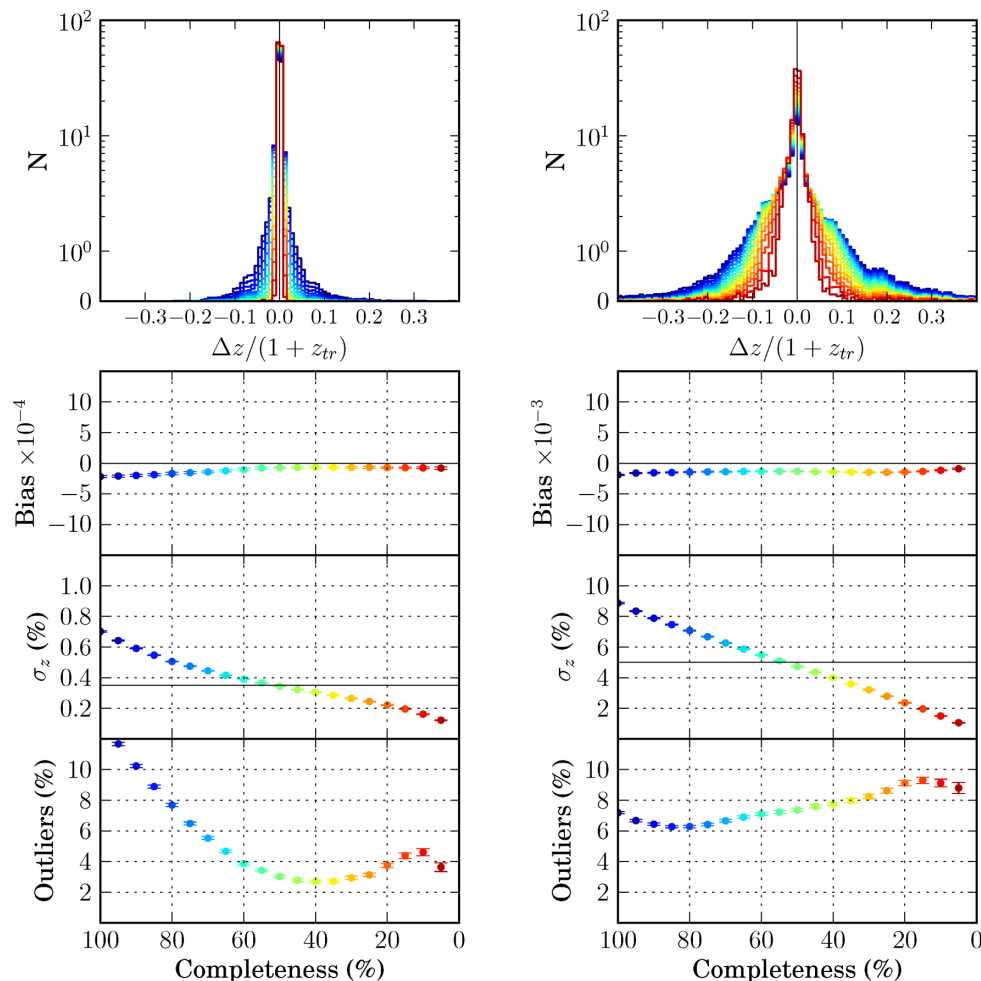

**Figure 11.** Top:  $\Delta z/(1+z_{tr})$  distributions for the BS (left) and the FS (right) at different photo- $z$  quality cuts whose completeness, shown in a colour degradation, range from 100 per cent (bluest) to 5 per cent (reddest) in 5 per cent steps. On the bottom and by rows: the bias (median), the photo- $z$  precision ( $\sigma_z$ ) and the  $3\sigma$ -outlier fraction of the distributions at the top as a function of the completeness. The colours of the points match the colours in the distributions. Note that the vertical scale in the bias and the  $\sigma_z$  panels changes by an order of magnitude between the two samples. The black-dashed horizontal lines on the  $\sigma_z$  panels show the photo- $z$  precision requirements defined in Gaztañaga et al. (2012):  $\sigma_z < 0.35$  per cent (BS) and  $< 5$  per cent (FS).

spectral feature is tracked, irregulars have the two emission lines [O II]  $\sim 3737$  Å and [O III]  $\sim 5000$  Å (Fig. 4) with intrinsic widths narrower than the width of the NB filters.

In the FS (Fig. 13), we see that the scatter of  $\Delta z/(1+z_{tr})$  is much larger, as expected from the wider histograms in Fig. 11. However, a wider but still tight core close to  $\Delta z = 0$  with high photo- $z$  quality (red points) remains. We recognize behaviours similar to those in the BS in most aspects of the  $z_{ph}$  performance, although they are substantially larger. For example, the highest magnitude as well as lowest and highest  $z_{tr}$  galaxies are the most biased. The *odds* cuts also mitigate this bias, but a residual bias of opposite sign persists at the extremes of  $z_{tr}$ . Spiral galaxies ( $t \sim 10$ – $30$ ) are also the ones with the highest bias, and the *odds* cuts even aggravates this. We also see that elliptical ( $t \sim 0$ ) and irregular ( $t > 50$ ) galaxies are initially biased, but, in contrast to spirals, the *odds* cuts help to reduce the bias. Unlike in the BS,  $\sigma_z$  increases along all the magnitude range since at those magnitudes the noise from the sky brightness dominates over the signal (Fig. 5). However, we see that the slope of the  $\sigma_z$  increase is smaller the harder the *odds* cuts. This is because the gain in photo- $z$  precision is at the expense of keeping only brighter galaxies each time. The mean  $i_{AB}$  magnitude goes from  $\sim 23.2$  to  $\sim 22.8$  with the *odds* cuts, and the shift in

the  $z_{tr}$  mean is from  $\sim 0.86$  to  $\sim 0.81$ . Unlike in the BS, we see that the best  $\sigma_z$  is obtained at the extremal spectral types:  $t \sim 0$  (elliptical) and  $t \sim 66$  (irregular). However, once the hardest *odds* cuts are applied, irregular galaxies with  $t \sim 50$  are again the one with the best  $\sigma_z$ . In fact, the hardest *odds* cuts also remove all spiral galaxies. Note that the large bias seen at the extremes of  $z_{tr}$  make  $\sigma_z$  take values much larger at these redshifts. The photo- $z$  precision requirement,  $\sigma_z < 5$  per cent, is fulfilled when the *odds* cut of 50 per cent completeness is applied up to magnitude  $\sim 23.1$ , for all galaxy types except spirals, and at the  $z_{tr}$  interval from  $\sim 0.4$  to  $\sim 1.3$ . As we already saw in Fig. 11, the  $3\sigma$ -outlier fraction grows with the *odds* cuts. In general, its values are higher where  $\sigma_z$  is lower, since the outliers criterion becomes more stringent.

#### 4.5 NBs versus BBs

We want to quantify the improvement that the NB bring to the photo- $z$  performance. For this purpose, we run BPZ on the BS and the FS using the NB and the BB separately. Then, in Fig. 14 and Table 5, we compare results between these runs and also with the original ones when the BB and the NB are used together (BB+NB). Fig. 14 shows normalized  $\Delta z/(1+z_{tr})$  distributions for the BS

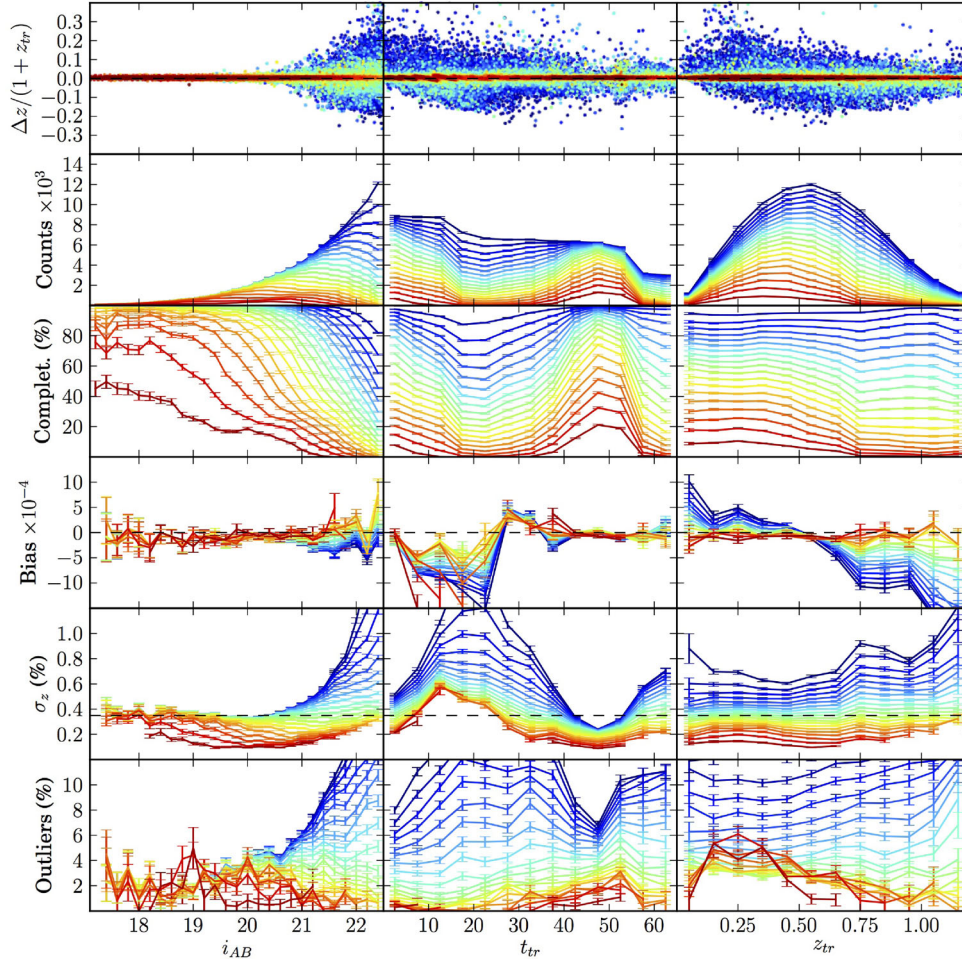

**Figure 12.** Statistics showing the PAU-BS photo- $z$  performance as a function of the observed  $i_{AB}$  magnitude (left), true galaxy type  $t_{tr}$  (centre) and true redshift  $z_{tr}$  (right). In the first row, we show the scatter  $\Delta z/(1+z_{tr})$ . Then, in a descending order of rows, we show the number of galaxies, the completeness, the bias (median), the photo- $z$  precision ( $\sigma_z$ ) and the  $3\sigma$ -outlier fraction for all the *odds* cuts shown in Fig. 11 (same colour). Also as in Fig. 11, the black-solid horizontal lines on the  $\sigma_z$  panels show the photo- $z$  precision requirement defined in Gaztañaga et al. (2012).

(red) and the FS (blue) using only the BB (dashed), only the NB (dotted) and both together BB+NB (solid). We see that the resulting distributions when using only BB (dashed) show overall shapes close to Gaussian with perhaps larger tails on both sides. However, when the NBs are also included (solid) the peaks of the distributions become clearly sharper. This is more noticeable in the BS than in the FS, because the non-observed condition ( $\sigma_m < 0.5$ ) defined in Section 3 implies that most of the NB are not used in the photo- $z$  determination for the FS. Table 5 shows bias (median),  $\sigma_z$  ( $\sigma_{68}$ ) and  $3\sigma$ -outlier fraction of each distribution.  $\sigma_z$  in the BS is reduced  $\sim 4.8$  times going from  $\sim 3.34$  to  $\sim 0.7$  per cent when the NB are included, while the improvement is much less significant in the FS. We also see that bias is reduced by an order of magnitude when the NB are included in both samples. On the contrary, the outlier fraction increases, but as mentioned, this is due to the fact that improvements on  $\sigma_z$  penalize the outlier fraction. On the other hand, we see that using NB alone slightly degrades all metrics in the BS and the FS, except the outlier fraction in the FS which is improved for the same reason. In fact,  $\sigma_z$  in the FS gets almost twice worse than when only using BB or BB+NB. It seems that in the FS NB by themselves only help the bias, while if they are used together with the BB, the improvement also extends to  $\sigma_z$ . These results are in qualitative agreement with previous findings using photometric

systems mixing BB and NB, such as those in Wolf, Meisenheimer & Rser (2001).

#### 4.6 Impact of the photo- $z$ on the clustering

We want to study the impact of the PAU photo- $z$  performance on the measurements of angular clustering. In Gaztañaga et al. (2012), it is shown that galaxy cross-correlation measurements  $\bar{\omega}_{ij}$  between two photo- $z$  bins  $i$  and  $j$  are related to their cross-correlation between real redshift bins  $\omega_{ij}$  as

$$\bar{\omega}_{ij}^{A \times B} = \sum_{kl} r_{ik}^A \omega_{kl}^{A \times B} r_{jl}^B = r_A \omega^{A \times B} r_B^T, \quad (16)$$

where  $r_{ij}$  is called the migration matrix and gives the probability that a galaxy observed at the photo- $z$  bin  $i$  will be actually at the true redshift bin  $j$ , while A and B denote different galaxy samples. We compute the migration matrices from the PAU photo- $z$  simulations and show them in Fig. 15 for the BS (top) and the FS (bottom) in photo- $z$  bins of width  $0.014(1+z)$ , which is four times the photo- $z$  precision  $\sigma_z$  in the BS once the photo- $z$  quality cut that leaves a 50 per cent completeness is applied. Note that the matrices are normalized row-wise by definition. The FS migration matrix has quite a thick diagonal, i.e. around  $z_{tr} \simeq 1$  the width is  $\Delta z \simeq 0.1$  for

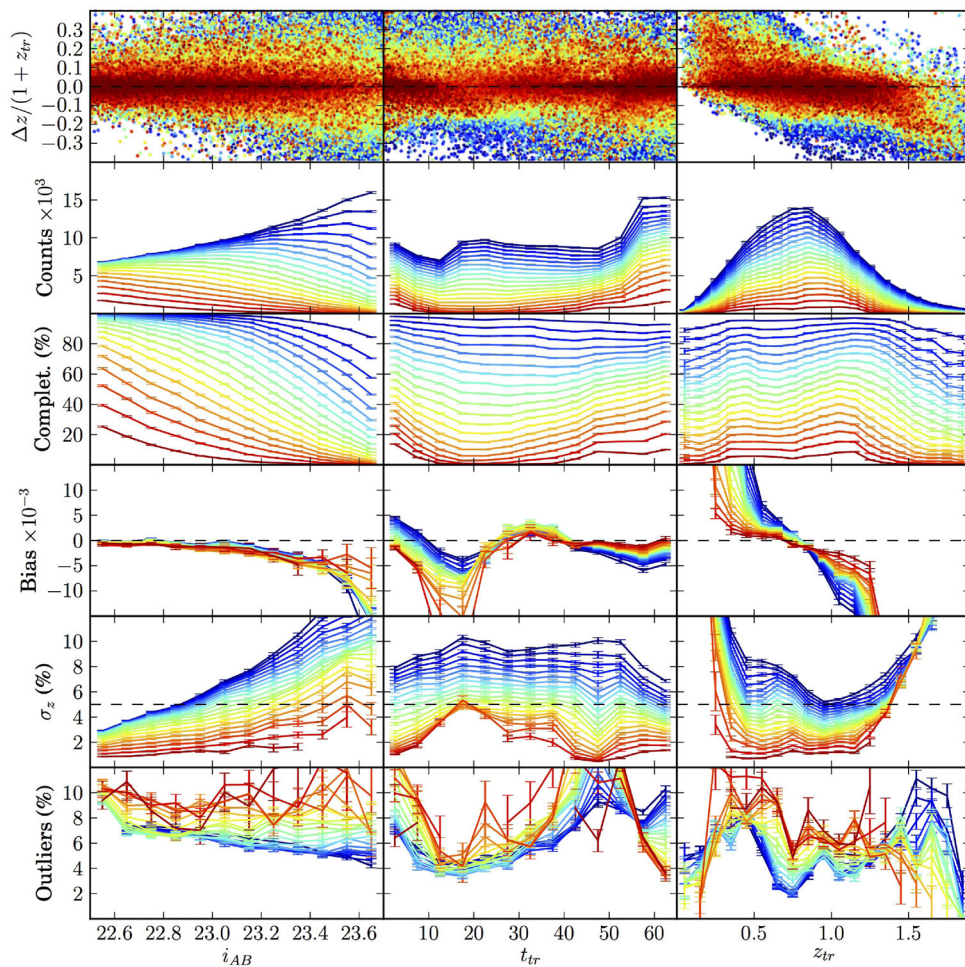

**Figure 13.** Statistics showing the PAU-FS photo- $z$  performance in the same layout as in Fig. 12.

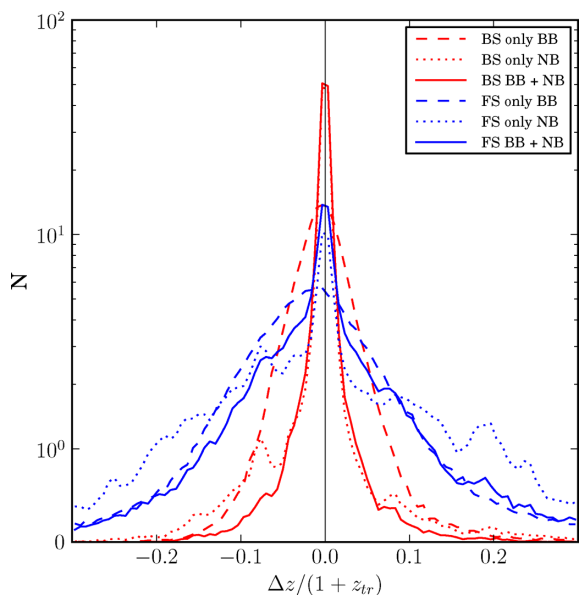

**Figure 14.** Normalized  $\Delta z/(1+z_{tr})$  distributions for the BS (red) and the FS (blue) using only BB (dashed), only NB (dotted) or both together BB+NB (solid). Bias,  $\sigma_z$  and  $3\sigma$ -outlier fraction of each distribution are shown in Table 5.

**Table 5.** Bias (median),  $\sigma_z$  ( $\sigma_{68}$ ) and  $3\sigma$ -outlier fraction when using only BB, only NB or both together BB+NB for the bright and faint samples.

|                       | BS      |        |         |
|-----------------------|---------|--------|---------|
|                       | BB      | NB     | BB + NB |
| Bias $\times 10^{-4}$ | -31.64  | -3.31  | -2.18   |
| $\sigma_z$ (per cent) | 3.34    | 0.83   | 0.70    |
| Outliers (per cent)   | 4.41    | 18.19  | 13.28   |
|                       | FS      |        |         |
|                       | BB      | NB     | BB + NB |
| Bias $\times 10^{-4}$ | -152.66 | -41.19 | -19.01  |
| $\sigma_z$ (per cent) | 9.38    | 16.17  | 8.86    |
| Outliers (per cent)   | 6.79    | 4.90   | 7.18    |

$\approx 10$  per cent probabilities and  $\Delta z \approx 0.4$  for  $\approx 1$  per cent. There are also outliers going from very large true redshifts  $z_{tr} \approx 1.8$  to lower photo- $z$  redshifts and some from low true redshifts up to  $z_{ph} \approx 1$ . The BS has a thinner diagonal with  $\Delta z < 0.04$  at  $\approx 1$  per cent probability and with fewer outliers. These values are of course in agreement with previous results in Figs 9 and 11.

To illustrate how these matrices affect angular clustering measurements, we use a simple model to predict  $\omega_{ij}$  at an arbitrary reference angular scale,  $\theta$ , of 1 arcmin. We include intrinsic galaxy

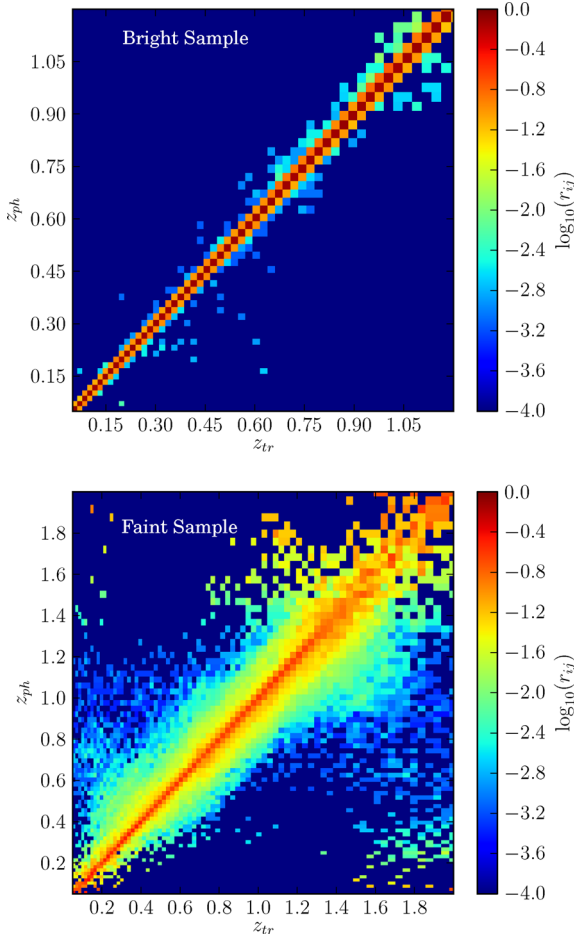

**Figure 15.** The resulting migration matrices  $r_{ij}$  from the PAU (photo- $z$  simulations after applying the photo- $z$  quality cut that leaves 50 per cent completeness. The top plot corresponds to the BS and the bottom plot to the FS. For a higher contrast and clarity, we plot the logarithm of the matrix values. These matrices give the probability that a galaxy observed at the photo- $z$  bin  $i$ , will be actually at the true redshift bin  $j$ . The bin widths are  $0.014(1+z)$ , four times the photo- $z$  precision expected in the BS.

clustering and weak lensing magnification:

$$\begin{aligned}
 w_{ij} &= w_{G_i G_j} + w_{G_i \mu_j} + w_{\mu_i G_j} + w_{\mu_i \mu_j} \\
 w_{G_i G_j} &= b_i b_j \int dz_1 dz_2 \phi_{G_i}(z_1) \phi_{G_j}(z_2) \xi(r_{12}) \\
 w_{G_i \mu_j} &= b_i \alpha_j \int dz_1 dz_2 \phi_{G_i}(z_1) p_{\mu_j}(z_2) \xi(r_{12}) \\
 w_{\mu_i \mu_j} &= \alpha_i \alpha_j \int dz_1 dz_2 p_{\mu_i}(z_1) p_{\mu_j}(z_2) \xi(r_{12}), \quad (17)
 \end{aligned}$$

where  $\xi(r_{12})$  is the non-linear matter two-point correlation between the positions of two galaxies separated in 3D space by  $r_{12} = r_2 - r_1$ , where the angular separation between  $r_1$  and  $r_2$  is fixed to be the reference angle (i.e.  $\theta = 1$  arcmin), while the radial separation is integrated out via  $z_1$  and  $z_2$ . We have that  $\phi_{G_i}(z)$  is a top-hat distribution for galaxies in the redshift bin  $i$  and  $p_{\mu_j}(z)$  is the efficiency of weak lensing effect for lenses at  $z$  and sources at  $z_j$  (following the notation in Gaztañaga et al. 2012). The coefficient  $b_i$  is the effective galaxy bias at  $z_i$  and  $\alpha_j \equiv 2.5s_j - 1$  is the amplitude of the weak lensing magnification effect (with  $s_j$  the slope of the galaxy number counts at the flux limit of the sample at  $z_j$ ). The first equation above has four terms corresponding to galaxy–

galaxy (intrinsic clustering), galaxy–magnification, magnification–galaxy and magnification–magnification correlation. In our test, we use  $\alpha_i = 1$  and  $b_i = 1$  to generate the starting point for  $\omega_{ij}$ . We then apply the following transformation:

$$\omega_{ij}^{B \times B} \rightarrow b_B(z_i) b_B(z_j) \omega_{ij} \quad (18)$$

$$\omega_{ij}^{F \times F} \rightarrow b_F(z_i) b_F(z_j) \omega_{ij} \quad (19)$$

$$\omega_{ij}^{B \times F} \rightarrow b_B(z_i) b_F(z_j) \omega_{ij} \quad (20)$$

depending on which galaxy samples we are cross-correlating (FS or BS), where

$$b_B(z_i) = 2 + 2(z_i - 0.5) \quad (21)$$

$$b_F(z_i) = 1.2 + 0.4(z_i - 0.5) \quad (22)$$

are the biases in the BS and FS, respectively, in the photo- $z$  bin  $i$  (at mean redshift  $z_i$ ). This corresponds to using linear bias for the intrinsic correlation (as in Gaztañaga et al. 2012) and some particular evolving slope ( $s_i \sim 1$ ) for the magnification cross-correlations. In Fig. 16, we show  $\omega_{ij}^{B \times B}$  (left),  $\omega_{ij}^{F \times F}$  (middle) and  $\omega_{ij}^{B \times F}$  (right) before (top) and after (bottom) being transformed by the migration matrices  $r_{ij}$  in Fig. 15 through equation (16). Note that for the B  $\times$  B and F  $\times$  F cases, the correlations matrices are symmetrical. Also note that the redshift ranges in both samples are different, so that the B  $\times$  F correlation matrix is not squared.

In the top panels, we can see the intrinsic galaxy–galaxy clustering in the diagonal of the matrix, which has an amplitude of order unity and decreases rapidly to zero for separated redshift bins. The galaxy–magnification correlation appears as a diffused off-diagonal cloud with an amplitude  $< 0.05$  (clear colours). The magnification–magnification contribution is negligible. In the bottom panel, we see the effect of the photo- $z$  migration. The diagonal (auto-correlations) becomes thicker and diluted. The off-diagonal galaxy–magnification cloud becomes more diffused, especially for the FS. The cross-correlation F  $\times$  B produces results that are intermediate between B  $\times$  B and F  $\times$  F.

We can invert the migration matrices to go from the bottom panels (which are the observations  $\bar{\omega}^{A \times B}$ ) to the top panels (i.e. true correlations  $\omega^{A \times B}$ ) by inverting equation (16):

$$\omega^{A \times B} = r_A^{-1} \bar{\omega}^{A \times B} (r_B^T)^{-1}. \quad (23)$$

This should work perfectly well if we can calibrate the  $r_{ij}$  matrices properly. For a large fiducial survey with about 5000 deg<sup>2</sup>, we need about  $\simeq 1$  per cent accuracy in  $r_{ij}$  (Gaztañaga et al. 2012). In practice, the accuracy of the above reconstruction can be used to put requirements on the photo- $z$  calibration.

## 5 OPTIMIZATION OF THE PAU FILTER SET

In this section, we want to explore how the photo- $z$  performance changes under variations of the PAU NB filter set.

### 5.1 NB filter set variations

We study five variations of the original NB filter set whose response is shown in Fig. 17. All the variations conserve the number of

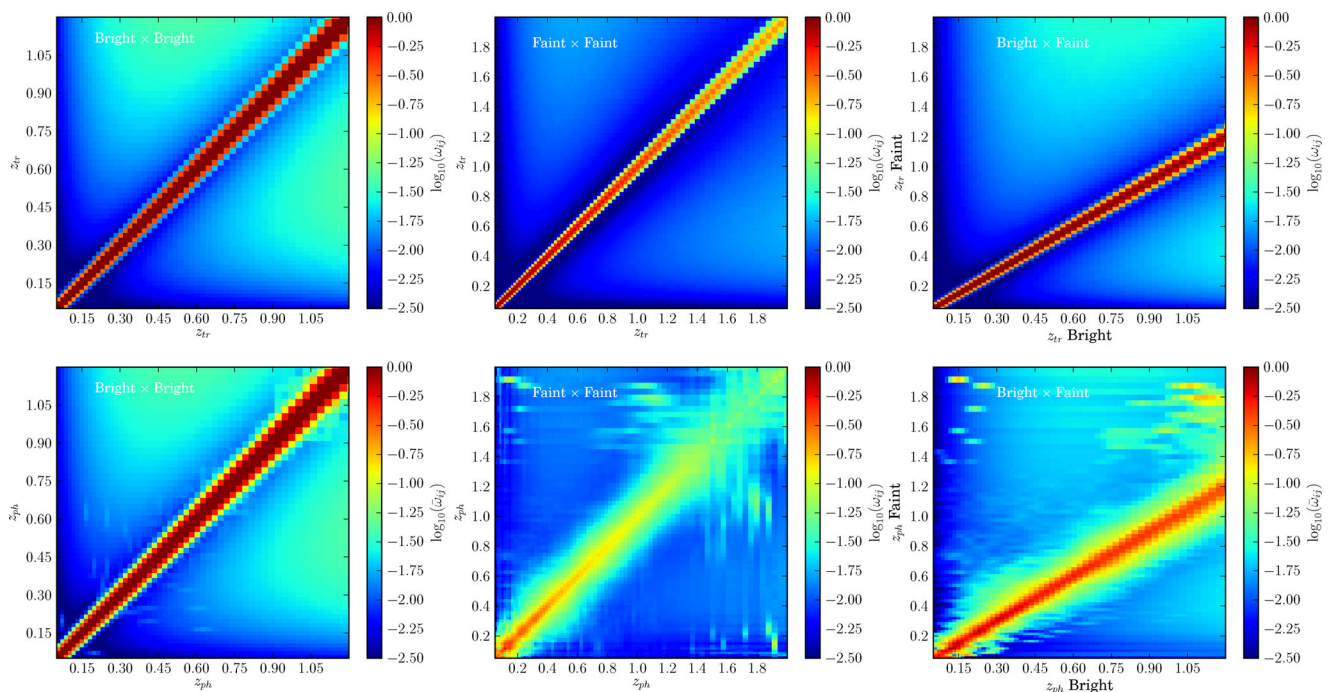

**Figure 16.** Top panels show the angular auto (diagonal) and cross- (off-diagonal) correlations  $\omega_{ij}$  at 1 arcmin between the true redshift bins  $i$  and  $j$  of the BS (left), the FS (middle) and the crossing of both of them (right). Bottom plots show the same correlations but measured with photo- $z$  bins, which can be computed by using equation (16) with the migration matrices in Fig. 15. The bin widths are  $0.014(1+z)$ , four times the photo- $z$  precision expected in the BS.

filters. In the order that appear in Fig. 17, the proposed filter sets are:

- (i) *Default*: this is the default filter set already shown in Fig. 2.
- (ii) *Log*: in this filter set, band widths increase in wavelength logarithmically, so that they fulfil  $\lambda_0/\Delta\lambda = \text{const.}$ , where  $\Delta\lambda$  is the width of the rectangular part of the band (without taking into account the lateral wings) and  $\lambda_0$  is the central wavelength of the band. We impose the overall wavelength range covered by the set of bands to be the same as for the *Default* filter set. Given that the total number of bands is kept at 40, we obtain that the bluest filter has a width of  $97 \text{ \AA}$ , while the reddest is  $159 \text{ \AA}$  wide. The reason for this filter set is that, when spectra are redshifted, their spectral features are moved to redder wavelengths, but also their widths are stretched as  $\Delta\lambda' = (1+z)\Delta\lambda$ . If the photo- $z$  determination depends strongly on the tracking of any spectral feature, such as the  $4000 \text{ \AA}$  break in elliptical galaxies, a filter set like *Log* will continue to enclose the same part of the spectral feature in a single feature independently of how redshifted is the spectrum.
- (iii) *Blueshift*: this is the same as the *Default* filter set, however bands have been shifted  $1000 \text{ \AA}$  towards bluer wavelengths. We expect to get better photo- $z$  performance at low redshift and for late-type galaxies. The down side of this filter set is that the overall response turns out to be very inefficient in the ultraviolet zone (middle-left of Fig. 17), like it was for the  $u$  band.
- (iv) *Redshift*: this is the same variation as before but shifting bands  $1000 \text{ \AA}$  towards redder wavelengths. We expect to get better photo- $z$  performance at high redshift and for early-type galaxies. This filter set does not suffer from the problem of the ultraviolet, so its band responses are much more uniform over the covered range (middle-right of Fig. 17). On the other hand, the sky brightness on this region is higher.
- (v)  $\times 0.5$  *width*: this is a filter set whose band widths are half of the *Default* ones. Lateral wings are also reduced to half of their size,

from  $25$  to  $12.5 \text{ \AA}$ , in order to avoid an excessive overlap between adjacent bands. We expect to improve the photo- $z$  precision, at least for galaxies with good S/N ratio on their photometry. The down side of this filter set is that, since the number of bands is kept, the overall wavelength range covered is also reduced by a half. We choose it to be centred with respect to the *Default*, so that it covers from  $5500$  to  $7500 \text{ \AA}$ , roughly spanning only from the bluest filter of the *Redshift* set to the reddest of the *Blueshift* set. This can lead to a degradation of the photo- $z$  at very low and high redshift, although the BBs may attenuate this effect.

(vi)  $\times 1.5$  *width*: this is a filter set whose band widths are 1.5 times wider than the *Default* ones. Because of this, we expect a significant degradation of the photo- $z$  precision for galaxies with good S/N ratio on their photometry. However, the increase in S/N may help. Moreover, the covered wavelength range also increases by 50 per cent. We choose the new range to be centred with respect to the *Default* set, so that it covers from  $3500$  to  $9500 \text{ \AA}$ , roughly from the bluest edge of the *Blueshift* set to the reddest edge of the *Redshift* set, so we expect to see a more uniform photo- $z$  performance over the whole redshift range.

We generate magnitudes for each filter set band as described in Section 3 using the same exposure times per NB filter tray and BB as in the *Default* filter set. We do not try to optimize the exposure times for each filter set. The aim of this study is to see how, in spite of this, the photo- $z$  performance changes. Once the new photometric mock catalogues are created, they are also split into a BS ( $i_{\text{AB}} < 22.5$ ) and FS ( $22.5 < i_{\text{AB}} < 23.7$ ). We run BPZ on each catalogue using the same settings as for the *Default* filter set. There is no need to calibrate a different prior for each filter set, since the prior was initially calibrated on the BB  $i$ , which is shared by all these filter sets. Photo- $z$  quality cuts resulting in an overall completeness of  $\sim 50$  per cent are applied in all cases.

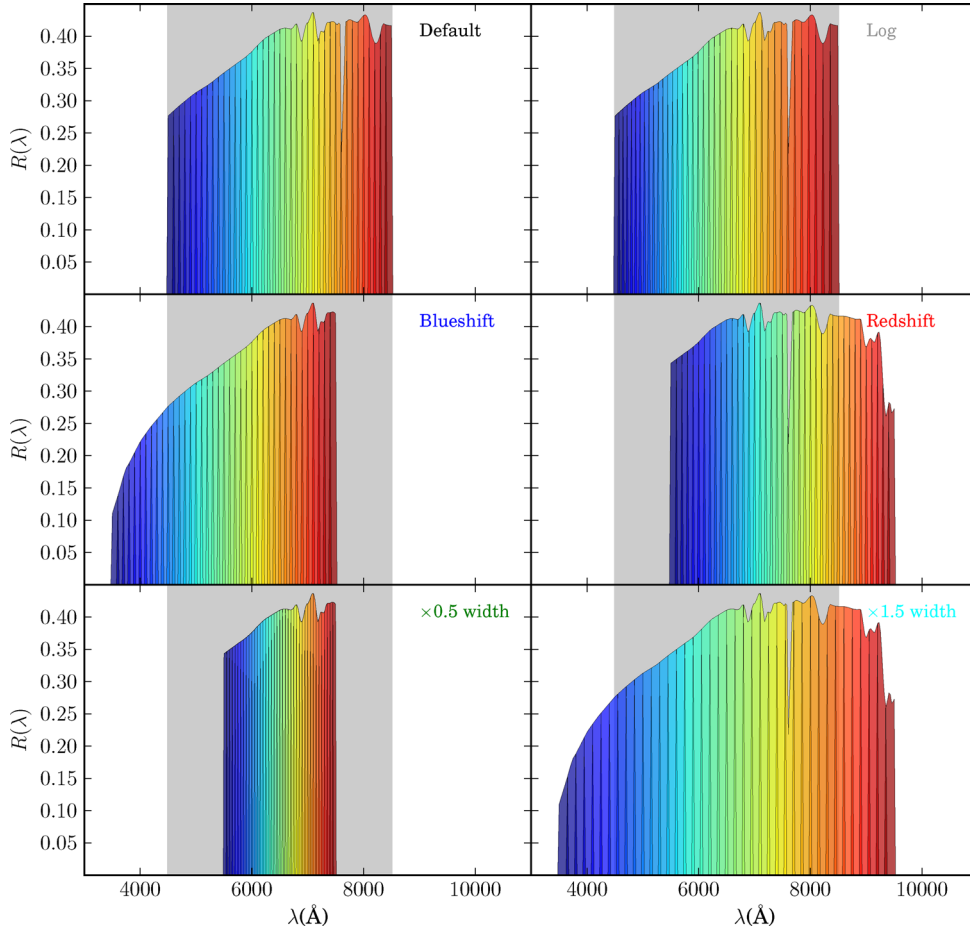

**Figure 17.** On the top left, the original PAU NB filter set (same as in Fig. 2). The rest are the five variations to be compared in terms of photo- $z$  performance. Greyed areas show the covered wavelength range by the *Default* filter set. In descending order from left to right we have: the *Log* filter set with the same overall range as the *Default* but with band widths that increase logarithmically; the *Blueshift* filter set, which is the same as the *Default* but with the bands shifted 1000 Å towards bluer wavelengths; the *Redshift* filter set which is the same as *Default* but shifted towards redder wavelengths; the  $\times 0.5$  *width* filter set whose band widths are half those of the *Default* ones; and the  $\times 1.5$  *width* filter set whose bands are 1.5 times wider. The overall wavelength ranges of these last two set-ups are chosen to be centred respect to the range of the *Default* set.

## 5.2 Global photo- $z$ performance

Global photo- $z$  performance results for each filter set are shown in Table 6, using the same metrics as in Section 4: bias (median),  $\sigma_z$  ( $\sigma_{68}$ ) and the  $3\sigma$ -outlier fraction. We find that the  $\times 0.5$  *width* set gives the best bias (it completely vanishes), and  $\sigma_z$  ( $\sim 6$  per cent better than *Default*) in the BS, while in the FS it is the *Redshift* set which gives the best bias ( $\sim 54$  per cent better) and the  $\times 1.5$  *width* set which gives the best  $\sigma_z$  ( $\sim 18$  per cent better). On the other hand, the  $\times 1.5$  *width* set gives the worst bias (a factor of 4.6 worse) and  $\sigma_z$  ( $\sim 32$  per cent worse) in the BS, while in the FS it is the *Blueshift* set which gives the worst bias (a factor of 2.4 worse) and the  $\times 0.5$  *width* which gives the worst  $\sigma_z$  ( $\sim 46$  per cent worse). Regarding the outlier fraction, its direct comparison is trickier since it depends on the value of  $\sigma_z$ . Even so, we see that in the BS the *Log* set gives the best value, while in the FS the  $\times 0.5$  *width* set gives the worst.

The general conclusions are that the *Log* set gives almost the same photo- $z$  performance as the *Default* set, with a slight increase of 3 per cent in  $\sigma_z$  in the BS. Therefore, we see that the logarithmic broadening of the band widths does not provide any global improvement. On the other hand, and as we expected, if the S/N ratio in the photometry is good enough, the narrower the bands, the better the

**Table 6.** Global photo- $z$  performance results for each filter set shown in Fig. 17. Photo- $z$  performance is characterized through the three metrics: bias (median),  $\sigma_z$  ( $\sigma_{68}$ ) and the  $3\sigma$ -outlier fraction. Photo- $z$  quality cuts resulting in a 50 per cent overall completeness are applied in all cases. We show results for the BS and FS.

|                       | Bias                   | $\sigma_z$ (per cent) | Outliers (per cent) |
|-----------------------|------------------------|-----------------------|---------------------|
| Default BS            | $-0.71 \times 10^{-4}$ | 0.34                  | 3.02                |
| Default FS            | $-1.33 \times 10^{-3}$ | 4.73                  | 7.36                |
| Blueshift BS          | $-2.11 \times 10^{-4}$ | 0.38                  | 3.23                |
| Blueshift FS          | $-3.11 \times 10^{-3}$ | 5.19                  | 7.05                |
| Redshift BS           | $-0.74 \times 10^{-4}$ | 0.35                  | 3.31                |
| Redshift FS           | $-0.65 \times 10^{-3}$ | 4.99                  | 7.21                |
| Log BS                | $-0.69 \times 10^{-4}$ | 0.35                  | 2.80                |
| Log FS                | $-1.46 \times 10^{-3}$ | 4.73                  | 7.43                |
| $\times 1.5$ width BS | $-3.18 \times 10^{-4}$ | 0.45                  | 3.00                |
| $\times 1.5$ width FS | $-2.76 \times 10^{-3}$ | 3.87                  | 7.76                |
| $\times 0.5$ width BS | $-0.00 \times 10^{-4}$ | 0.32                  | 5.22                |
| $\times 0.5$ width FS | $-0.99 \times 10^{-3}$ | 6.91                  | 5.52                |

photo- $z$  performance results. On the other hand, wider bands are the ones that give better photo- $z$  precision in the FS, because there are more bands that pass the cut  $\sigma_m < 0.5$  introduced in Section 3.

### 5.3 Results as a function of $i_{AB}$ , $t_{tr}$ and $z_{tr}$

In Fig. 18, we show plots similar to those in Figs 12 and 13 with the photo- $z$  performance metrics as a function of  $i_{AB}$ ,  $t_{tr}$  and  $z_{tr}$  for the BS (top) and the FS (bottom) when using the different filter sets of Fig. 17. Black curves correspond to the photo- $z$  results of the *Default* filter set when the 50 per cent completeness photo- $z$  quality cut is applied, and we will treat them as the reference results. The rest of the curves in different colours correspond to the variations of the *Default* filter set. As a general trend, we see that these curves do not deviate much from the reference. Even so, we will discuss each case separately.

In the BS, we see that redshifting the bands (red curves) slightly degrades the completeness at low magnitudes up to  $i_{AB} < 21.5$ . As was expected, all the metrics also degrade at low  $z_{tr}$ . In contrast, blueshifting the bands (blue curves) shows the opposite behaviour, a degradation of all the metrics at high  $z_{tr}$ . This is due to the lack of coverage at blue and red wavelengths, respectively, of each filter set, as we have already mentioned before. Something similar happens for the  $\times 0.5$  width set, where band widths, and consequently the covered wavelength range, is reduced by a half (green curve). The resulting photo- $z$  performance is worse at both low and high  $z_{tr}$ . However, the photo- $z$  precision  $\sigma_z$  is slightly better at intermediate redshifts ( $0.15 < z_{tr} < 0.5$ ), for spiral galaxies ( $10 < t_{tr} < 30$ ) and at bright magnitudes ( $i_{AB} < 20.5$ ). Increasing the band width by a factor of 1.5 (cyan curve) does not result in an improvement in any case. Bias and  $\sigma_z$  degrade all over the range of the three variables,  $i_{AB}$ ,  $t_{tr}$  and  $z_{tr}$ . This is in full agreement with the results shown in Table 6, where this filter set was seen as giving the worst photo- $z$  performance. Also in agreement with Table 6, we see that the *Log* filter set practically does not introduce any change from the *Default* filter set.

In the FS, we do not observe big differences between the completeness curves, but for example the *Blueshift* filter set shows slightly lower completeness for elliptical galaxies than for irregulars, unlike the *Redshift* and  $\times 0.5$  width filter sets, which show the opposite behaviour. In the  $z_{tr}$  range, we also recognize similar behaviours as in the BS, as for example the fact that the *Blueshift* filter set shows better completeness at low  $z_{tr}$  and worse at high, as well as the opposite behaviour of the *Redshift* and  $\times 0.5$  width filter sets. The *Blueshift* filter set seems to cause a significant degradation in the bias for faint, spiral and high-redshift galaxies, and also delivers a considerably worse  $\sigma_z$  than the *Default* over all the ranges. In return, the *Redshift* filter set shows better bias at high magnitudes and redshifts. On the other hand, we observe that the  $\times 0.5$  width filter set shows much more pronounced trends on the bias, in particular at  $i_{AB} > 23.1$ , spiral galaxies and over all the  $z_{tr}$  range, where values are substantially worse than for the *Default* filter set. As in Table 6, we observe that the worst  $\sigma_z$  is found for the  $\times 0.5$  width filter set, while the best is for the  $\times 1.5$  width filter set over all the ranges. This is exactly the opposite to the behaviour seen for the BS. In general, narrower bands are useful in the BS, but not in the FS.

## 6 DISCUSSION AND CONCLUSIONS

In the previous sections, we have seen that, at the level of simulated data, a photo- $z$  precision of  $\sigma_z \sim 0.0035(1+z)$  can be achieved for

$\sim 50$  per cent of galaxies at  $i_{AB} < 22.5$  by using a photometric filter system of 40 NBs of  $125 \text{ \AA}$  width together with the *ugrizY* BBs. The precision degrades to  $\sigma_z \sim 0.05(1+z)$  when we move to the magnitude range  $22.5 < i_{AB} < 23.7$ . These coincide with the two photo- $z$  precision requirements defined in Gaztañaga et al. (2012) needed to simultaneously measure RSD and MAG on two samples, one on the foreground and one on the background, over the same area of the sky. The galaxies removed are the ones with the worst photo- $z$  quality according to our photo- $z$  algorithm used. In Martí et al. (2014), it is shown that this kind of cuts, when they remove a substantial fraction of galaxies, can grossly bias the measured galaxy clustering. However, in the same paper the authors propose a way to correct for it.

In this analysis, we use a set of templates to generate the SEDs for the test galaxies, and then a subset of this same template set to measure the photo- $z$ . This is clearly an idealized process that cannot be used with real data. However, when dealing with real data, one can still modify and optimize the templates used in the photo- $z$  determination so that they reproduce as closely as possible the observed SEDs. Therefore, we consider the results here as reasonably realistic.

On the other hand, we found that spiral galaxies are the ones that give the worst photo- $z$  performance. Moreover, quality cuts mostly remove them. Contrary to what was assumed in Benítez et al. (2009), elliptical galaxies do not provide the best photo- $z$  performance, but irregular galaxies with prominent emission lines at  $\sim 3737 \text{ \AA}$  [O II] and  $\sim 5000 \text{ \AA}$  [O III] are actually the ones that give the best performance. A possibility is that these two emission lines are better traced by the NBs than a single feature as the  $4000 \text{ \AA}$  break of elliptical galaxies, making the photo- $z$  determination more robust.

Furthermore, these lines are narrower than the relatively broad  $4000 \text{ \AA}$  break, and this would explain the higher precision observed for irregular galaxies. However, a caveat may be in order here: the variability in the equivalent widths of these lines that is found in nature might not be completely captured by the templates we have used, so that in real data the photo- $z$  precision for these irregular galaxies might degrade slightly.

We also studied the effect of including the 40 NBs in a typical BB filter set *ugrizY*. We find that the  $\Delta z/(1+z_{tr})$  distributions become more peaky around the maximum moving away from Gaussianity. Bias improves by an order of magnitude. Precision also improves by a factor of  $\sim 5$  below  $i_{AB} \sim 22.5$ . However, the low S/N in NBs makes the improvement very small within  $22.5 < i_{AB} < 23.7$ , concluding that NBs at faint magnitudes are useful to improve the bias but not the precision.

We have also estimated the photo- $z$  migration matrices  $r_{ij}$  which correspond to the probability that a galaxy observed at the photo- $z$  bin  $i$  is actually at the true redshift bin  $j$ . These are shown in Fig. 15 for both the BS and FS. We then show (in Fig. 16) how this photo- $z$  migration matrix  $r$  distorts the observed auto- and cross-correlation of galaxies in narrow redshift bins. We show results for both the intrinsic clustering, which dominates the diagonal in the measured angular cross-correlation matrix,  $\bar{\omega}$ , and the magnification effect, which appears as a diffused off-diagonal cloud in  $\bar{\omega}_{ij}$ . The true cross-correlation matrix  $\omega_{ij}$  can be obtained from the inverse migration  $r^{-1}$  with a simple matrix operation:  $\omega = r^{-1} \cdot \bar{\omega} \cdot (r^T)^{-1}$ . This is a standard deconvolution problem, and it is only limited by how well we know the migration matrix.

In the last section, we find that introducing slight variations on the 40 NB filter set, such as: shifting bands to the higher/lower wavelengths, narrowing/broadening or increasing logarithmically



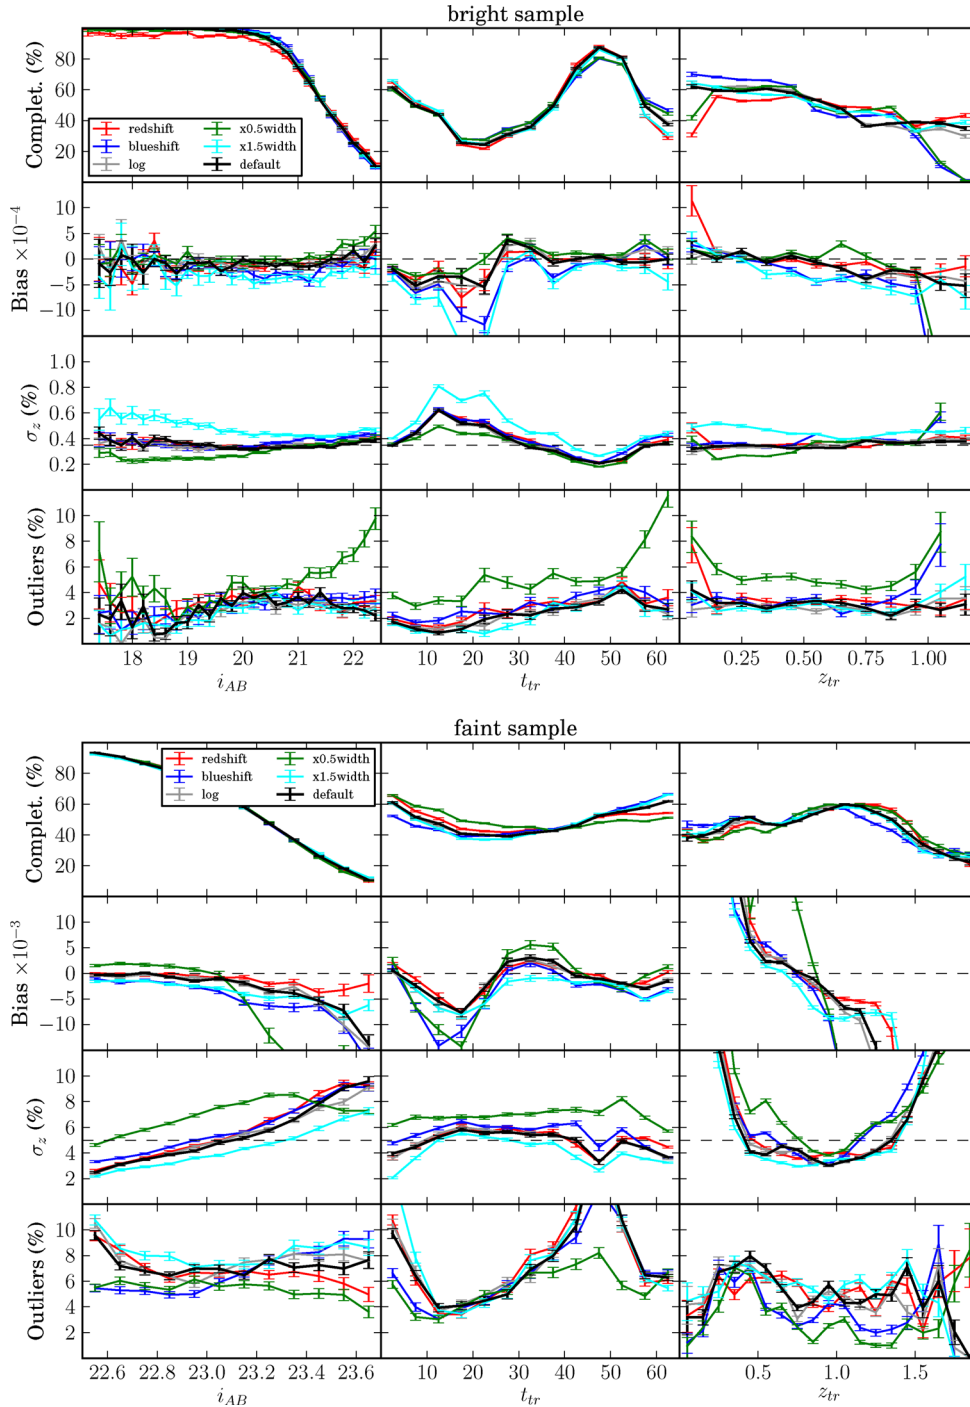

**Figure 18.** Photo- $z$  performance metrics using the different filter sets shown in Fig. 17. Rows: completeness after applying a photo- $z$  quality cut leading to a 50 per cent global completeness; bias (median);  $\sigma_z$  ( $\sigma_{68}$ ) and  $3\sigma$ -outlier fraction, as a function of  $i_{AB}$ ,  $t_{tr}$  and  $z_{tr}$  (columns), in the BS (top) and the FS (bottom).

band widths, do not introduce significant changes on the final photo- $z$  performance. Even so, general trends are that narrowing/broadening bands improve/worsens the photo- $z$  performance below/above  $i_{AB} \sim 22.5$ , while red/blueshifting bands improve the photo- $z$  performance at high/low redshifts or the quality-cuts efficiency for early-/late-type galaxies. Logarithmically growing band widths do not turn into any measurable improvement. Therefore, we conclude that the initial proposed filter set of 40 NBs seems to be close to optimal for the purposes of the PAU Survey at the WHT.

## ACKNOWLEDGEMENTS

We thank Christopher Bonnett, Ricard Casas, Samuel Farrens, Stéphanie Jovel, Eusebio Sánchez and Ignacio Sevilla for their help and useful discussions. Funding for this project was partially provided by the Spanish Ministerio de Economía y Competitividad (MINECO) under projects AYA2009-13936, AYA2012-39559, AYA2012-39620, FPA2012-39684, Consolider-Ingenio 2010 CSD2007-00060 and Centro de Excelencia Severo Ochoa SEV-2012-0234.

## REFERENCES

- Benítez N., 2000, ApJ, 536, 571  
 Benítez N. et al., 2009, ApJ, 691, 241  
 Bolzonella M., Miralles J., Pell R., 2000, A&A, 492, 476  
 Brammer G. B., van Dokkum P. G., Coppi P., 2008, ApJ, 686, 1503  
 Carrasco Kind M., Brunner R. J., 2013, MNRAS, 432, 1483  
 Coe D., Benítez N., Sánchez S. F., Jee M., Bouwens R., Ford H., 2006, AJ, 132, 926  
 Coleman G. D., Wu C.-C., Weedman D. W., 1980, ApJS, 43, 393  
 Colless M. et al., 2001, MNRAS, 328, 1039  
 Collister A. A., Lahav O., 2004, PASP, 116, 345  
 Dahlen T., Mobasher B., Somerville R. S., Moustakas L. A., Dickinson M. Others, 2005, ApJ, 631, 126  
 Dawson K. S. et al., 2013, AJ, 145, 10  
 Drinkwater M. J. et al., 2010, MNRAS, 401, 1429  
 Efron B., 1979, Ann. Stat., 7, 1  
 Gaztañaga E., Eriksen M., Crocce M., Castander F. J., Fosalba P., Martí P., Miquel R., Cabré A., 2012, MNRAS, 422, 2904  
 Gerdes D. W., Sypniewski A. J., McKay T. A., Hao J., Weis M. R., Wechsler R. H., Busha M. T., 2010, ApJ, 715, 823  
 Hogg D. W., Baldry I. K., Blanton M. R., Eisenstein D. J., 1996, preprint ([astro-ph/0210394v1](https://arxiv.org/abs/astro-ph/0210394v1))  
 Ilbert O. et al., 2006, A&A, 457, 841  
 Jouvel S. et al., 2009, A&A, 504, 359  
 Kaiser N., Tonry J. L., Luppino G. A., 2000, PASP, 112, 768  
 Le Fèvre O. et al., 2005, A&A, 439, 845  
 Martí P., Miquel R., Bauer A., Gaztanaga E., 2014, MNRAS, 437, 3490  
 Moles M. et al., 2008, AJ, 136, 1325  
 Oke J. B., Schild R. E., 1970, ApJ, 161, 1015  
 Tyson J., Wittman D., Hennawi J., Spergel D., 2003, Nucl. Phys. B, 124, 21  
 Wolf C., Meisenheimer K., Rser H.-J., 2001, A&A, 365, 660  
 York D. G. et al., 2000, AJ, 120, 1579

This paper has been typeset from a  $\text{\TeX}/\text{\LaTeX}$  file prepared by the author.
